# Supplementary material
Source: PubMed Central journal article supplement (PMC2736873)
Supplement: NIHMS124437-supplement-supplement_1.pdf [file NIHMS124437-supplement-supplement_1.pdf]

Type of file: table

Label: Table 1s

Filename: Supplemental\_table1s\_BANK1.pdf

**Supplementary Table 1.** Detailed demographics and sources of European-derived study samples

| <i>Contributor</i>               | <i>Case</i> | <i>Control</i> | <i>Total</i> |
|----------------------------------|-------------|----------------|--------------|
| G.S. Gilkeson                    | 78          | 191            | 269          |
| J.A. James                       | 104         | 89             | 193          |
| J.T. Merrill                     | 78          | 2              | 80           |
| K.L. Moser/P.M. Gaffney          | 304         | 0              | 304          |
| LFRR <sup>a</sup>                | 310         | 320            | 630          |
| M.E. Alarcon-Riquelme            | 170         | 0              | 170          |
| P.K. Gregersen                   | 0           | 410            | 410          |
| PROFILE Study Group <sup>b</sup> | 597         | 1095           | 1692         |
| T.J. Vyse                        | 251         | 545            | 796          |
| <i>Totals</i>                    | <i>1892</i> | <i>2652</i>    | <i>4544</i>  |

Abbreviation: LFRR, Lupus Family Registry Repository.

<sup>a</sup>LFRR principle contact: John B. Harley

<sup>b</sup>PROFILE Study Group Members: Graciela S Alarcón, Elizabeth E Brown, Robert P Kimberly, Jeffery C Edberg, Rosalind Ramsey-Goldman, John D Reveille, Gerald McGwin, Jr., Luis Vilá, Michelle Petri

Type of file: table

Label: Table 2

Filename: BANK1\_Supplemental\_Table2.pdf

**Supplemental Table 2a.** Detailed results from the multivariate logistic regression analysis of 38 SNPs around and within BANK1 with Bioplex 2200 autoantibody data as covariate factors

| SNP                           | No Covariate   |                    | Chromatin      |                    | dsDNA          |                    |
|-------------------------------|----------------|--------------------|----------------|--------------------|----------------|--------------------|
|                               | P              | OR (95% C.I.)      | P              | OR (95% C.I.)      | P              | OR (95% C.I.)      |
| rs4632664                     | 0.5919         | 0.89 (1.35 - 0.91) | 0.9051         | 1.03 (1.60 - 0.89) | 0.8897         | 0.97 (1.50 - 0.80) |
| rs17199964                    | 0.1474         | 0.75 (1.11 - 0.58) | 0.5755         | 0.89 (1.35 - 0.43) | 0.4303         | 0.85 (1.28 - 0.18) |
| rs4371620                     | 0.2507         | 0.85 (1.12 - 0.62) | 0.6205         | 0.93 (1.25 - 0.69) | 0.6895         | 0.94 (1.25 - 0.25) |
| rs11097755                    | 0.5632         | 1.07 (1.33 - 0.40) | 0.3973         | 1.11 (1.42 - 0.59) | 0.5937         | 1.07 (1.35 - 0.75) |
| rs4699258                     | 0.1278         | 0.84 (1.05 - 0.30) | 0.3001         | 0.88 (1.13 - 0.16) | 0.1623         | 0.84 (1.07 - 0.14) |
| rs9998865                     | 0.2193         | 0.81 (1.14 - 0.07) | 0.06968        | 0.69 (1.03 - 0.39) | 0.3881         | 0.85 (1.22 - 0.27) |
| rs7656409                     | <b>0.02283</b> | 0.78 (0.97 - 0.03) | <b>0.025</b>   | 0.77 (0.97 - 0.06) | 0.05776        | 0.80 (1.01 - 0.03) |
| rs6833249                     | 0.21           | 0.80 (1.13 - 0.08) | 0.07523        | 0.70 (1.04 - 0.36) | 0.3592         | 0.84 (1.21 - 0.26) |
| rs4572885                     | 0.2303         | 0.87 (1.09 - 0.29) | 0.2905         | 0.88 (1.12 - 0.20) | 0.2008         | 0.86 (1.09 - 0.21) |
| <b>rs17266594<sup>b</sup></b> | 0.2701         | 0.88 (1.11 - 0.48) | 0.4805         | 0.91 (1.18 - 0.28) | 0.2801         | 0.87 (1.12 - 0.25) |
| <b>rs10516487<sup>b</sup></b> | 0.2701         | 0.88 (1.11 - 0.48) | 0.4805         | 0.91 (1.18 - 0.28) | 0.2801         | 0.87 (1.12 - 0.25) |
| rs10516486                    | 0.4058         | 0.91 (1.14 - 0.50) | 0.5011         | 0.92 (1.18 - 0.44) | 0.4358         | 0.91 (1.15 - 0.36) |
| rs1469019                     | 0.6672         | 1.10 (1.69 - 1.00) | 0.9974         | 1.00 (1.62 - 0.63) | 0.6283         | 1.12 (1.77 - 0.73) |
| rs11931658                    | 0.1945         | 0.86 (1.08 - 0.17) | 0.1705         | 0.84 (1.08 - 0.11) | 0.114          | 0.82 (1.05 - 0.14) |
| rs12498977                    | 0.9224         | 1.02 (1.60 - 0.66) | 0.6578         | 0.89 (1.49 - 0.89) | 0.8896         | 1.04 (1.67 - 0.98) |
| <b>rs4698977<sup>b</sup></b>  | 0.07106        | 0.81 (1.02 - 0.15) | 0.149          | 0.83 (1.07 - 0.04) | <b>0.04229</b> | 0.78 (0.99 - 0.06) |
| rs12331849                    | 0.1095         | 0.84 (1.04 - 0.16) | 0.1586         | 0.84 (1.07 - 0.09) | 0.08837        | 0.82 (1.03 - 0.09) |
| rs3733197                     | 0.05854        | 0.80 (1.01 - 0.11) | 0.1104         | 0.81 (1.05 - 0.05) | <b>0.04614</b> | 0.78 (1.00 - 0.05) |
| rs10014485                    | 0.4446         | 0.87 (1.24 - 0.64) | 0.644          | 0.91 (1.34 - 0.79) | 0.7886         | 0.95 (1.38 - 0.64) |
| rs12331595                    | 0.0823         | 0.82 (1.03 - 0.16) | 0.1621         | 0.84 (1.07 - 0.08) | 0.07596        | 0.81 (1.02 - 0.09) |
| rs17208914                    | 0.1692         | 1.16 (1.44 - 0.15) | 0.1514         | 1.19 (1.50 - 0.08) | 0.08443        | 1.22 (1.54 - 0.13) |
| rs13125328                    | 0.1182         | 0.75 (1.07 - 0.11) | 0.1137         | 0.72 (1.08 - 0.15) | 0.1499         | 0.76 (1.11 - 0.08) |
| rs2850374                     | 0.6893         | 1.07 (1.52 - 0.58) | 0.5834         | 1.11 (1.63 - 0.65) | 0.6495         | 1.09 (1.58 - 0.62) |
| rs2850377                     | 0.09769        | 0.83 (1.03 - 0.07) | 0.07162        | 0.80 (1.02 - 0.04) | <b>0.04031</b> | 0.78 (0.99 - 0.06) |
| rs2851318                     | 0.755          | 1.06 (1.49 - 0.61) | 0.6088         | 1.10 (1.61 - 0.69) | 0.6895         | 1.08 (1.56 - 0.68) |
| rs2631268                     | 0.1689         | 1.18 (1.48 - 0.14) | 0.1448         | 1.21 (1.57 - 0.27) | 0.2661         | 1.15 (1.48 - 0.24) |
| rs7685012                     | 0.7777         | 0.95 (1.32 - 0.81) | 0.8076         | 1.05 (1.49 - 0.52) | 0.5198         | 0.89 (1.27 - 0.93) |
| rs10516491                    | 0.7152         | 0.86 (1.95 - 0.61) | 0.6115         | 0.79 (1.99 - 0.41) | 0.4089         | 0.68 (1.71 - 0.73) |
| rs2658529                     | 0.3159         | 1.19 (1.68 - 0.24) | 0.2367         | 1.25 (1.82 - 0.24) | 0.2412         | 1.24 (1.78 - 0.45) |
| rs3113676                     | 0.6307         | 1.23 (2.89 - 0.95) | 0.9474         | 1.03 (2.74 - 0.47) | 0.466          | 1.39 (3.37 - 0.48) |
| rs3113677                     | 0.6417         | 0.91 (1.38 - 0.37) | 0.3687         | 0.80 (1.30 - 0.89) | 0.8875         | 0.97 (1.51 - 0.81) |
| rs12649238                    | <b>0.03577</b> | 1.34 (1.75 - 0.06) | 0.05775        | 1.33 (1.79 - 0.06) | 0.06034        | 1.32 (1.75 - 0.08) |
| rs10516489                    | 0.08764        | 0.83 (1.03 - 0.18) | 0.178          | 0.85 (1.08 - 0.05) | 0.05452        | 0.79 (1.00 - 0.09) |
| rs7692330                     | 0.9983         | 1.00 (1.50 - 0.84) | 0.8394         | 0.95 (1.50 - 0.53) | 0.5316         | 1.14 (1.74 - 0.78) |
| rs6816285                     | 0.4291         | 0.92 (1.13 - 0.25) | 0.2549         | 0.87 (1.10 - 0.64) | 0.6397         | 0.95 (1.18 - 0.51) |
| rs1813006                     | 0.9946         | 1.00 (1.55 - 0.81) | 0.8084         | 1.06 (1.71 - 0.96) | 0.9582         | 1.01 (1.61 - 0.93) |
| rs173218                      | <b>0.01217</b> | 1.42 (1.86 - 0.04) | <b>0.03648</b> | 1.38 (1.86 - 0.01) | <b>0.01464</b> | 1.43 (1.91 - 0.03) |
| rs236768                      | <b>0.01654</b> | 1.40 (1.85 - 0.05) | <b>0.04741</b> | 1.36 (1.85 - 0.02) | <b>0.0154</b>  | 1.43 (1.91 - 0.03) |

**Abbreviations:** SNP, Single Nuclear Polymorphism; P, p-value; ODDS, Odds Ratio; L95, Lower Bound of 95% Confidence Interval; U95, Upper Bound of 95% Confidence Interval

<sup>b</sup>SNPs rs17266594, rs10516487, and rs4698977 are partially imputed as described in the Materials and Methods section.

**Supplemental Table 2b.** Detailed results from the multivariate logistic regression analysis of 38 SNPs around and within BANK1 with Bioplex 2200 autoantibody data as covariate factors

| SNP                           | No Covariate   |                    | Ribosomal P    |                    | RNP 68kD       |                    |
|-------------------------------|----------------|--------------------|----------------|--------------------|----------------|--------------------|
|                               | P              | OR (95% C.I.)      | P              | OR (95% C.I.)      | P              | OR (95% C.I.)      |
| rs4632664                     | 0.5919         | 0.89 (1.35 - 0.91) | 0.7973         | 0.95 (1.44 - 0.63) | 0.6278         | 0.90 (1.37 - 0.64) |
| rs17199964                    | 0.1474         | 0.75 (1.11 - 0.58) | 0.1833         | 0.76 (1.14 - 0.14) | 0.143          | 0.74 (1.11 - 0.10) |
| rs4371620                     | 0.2507         | 0.85 (1.12 - 0.62) | 0.246          | 0.85 (1.12 - 0.27) | 0.2698         | 0.86 (1.13 - 0.33) |
| rs11097755                    | 0.5632         | 1.07 (1.33 - 0.40) | 0.7523         | 1.04 (1.30 - 0.69) | 0.6882         | 1.05 (1.31 - 0.55) |
| rs4699258                     | 0.1278         | 0.84 (1.05 - 0.30) | 0.1384         | 0.84 (1.06 - 0.11) | 0.1062         | 0.83 (1.04 - 0.08) |
| rs9998865                     | 0.2193         | 0.81 (1.14 - 0.07) | 0.2729         | 0.82 (1.17 - 0.25) | 0.2507         | 0.82 (1.15 - 0.38) |
| rs7656409                     | <b>0.02283</b> | 0.78 (0.97 - 0.03) | <b>0.03175</b> | 0.79 (0.98 - 0.02) | <b>0.02083</b> | 0.78 (0.96 - 0.02) |
| rs6833249                     | 0.21           | 0.80 (1.13 - 0.08) | 0.2583         | 0.82 (1.16 - 0.24) | 0.2377         | 0.81 (1.15 - 0.36) |
| rs4572885                     | 0.2303         | 0.87 (1.09 - 0.29) | 0.2105         | 0.87 (1.09 - 0.18) | 0.1811         | 0.86 (1.08 - 0.17) |
| <b>rs17266594<sup>b</sup></b> | 0.2701         | 0.88 (1.11 - 0.48) | 0.2473         | 0.87 (1.10 - 0.25) | 0.246          | 0.87 (1.10 - 0.19) |
| <b>rs10516487<sup>b</sup></b> | 0.2701         | 0.88 (1.11 - 0.48) | 0.2473         | 0.87 (1.10 - 0.25) | 0.246          | 0.87 (1.10 - 0.19) |
| rs10516486                    | 0.4058         | 0.91 (1.14 - 0.50) | 0.356          | 0.90 (1.13 - 0.38) | 0.3807         | 0.90 (1.13 - 0.41) |
| rs1469019                     | 0.6672         | 1.10 (1.69 - 1.00) | 0.7252         | 1.08 (1.68 - 0.65) | 0.6491         | 1.11 (1.71 - 0.42) |
| rs11931658                    | 0.1945         | 0.86 (1.08 - 0.17) | 0.1385         | 0.84 (1.06 - 0.14) | 0.1437         | 0.84 (1.06 - 0.12) |
| rs12498977                    | 0.9224         | 1.02 (1.60 - 0.66) | 0.975          | 0.99 (1.58 - 0.97) | 0.9725         | 0.99 (1.57 - 0.68) |
| <b>rs4698977<sup>b</sup></b>  | 0.07106        | 0.81 (1.02 - 0.15) | 0.06208        | 0.80 (1.01 - 0.06) | 0.06095        | 0.80 (1.01 - 0.04) |
| rs12331849                    | 0.1095         | 0.84 (1.04 - 0.16) | 0.09475        | 0.83 (1.03 - 0.09) | 0.09261        | 0.83 (1.03 - 0.10) |
| rs3733197                     | 0.05854        | 0.80 (1.01 - 0.11) | <b>0.04641</b> | 0.79 (1.00 - 0.04) | <b>0.0417</b>  | 0.79 (0.99 - 0.03) |
| rs10014485                    | 0.4446         | 0.87 (1.24 - 0.64) | 0.6362         | 0.92 (1.31 - 0.48) | 0.4825         | 0.88 (1.26 - 0.49) |
| rs12331595                    | 0.0823         | 0.82 (1.03 - 0.16) | 0.0874         | 0.82 (1.03 - 0.07) | 0.07222        | 0.82 (1.02 - 0.06) |
| rs17208914                    | 0.1692         | 1.16 (1.44 - 0.15) | 0.1313         | 1.18 (1.47 - 0.11) | 0.1082         | 1.20 (1.49 - 0.13) |
| rs13125328                    | 0.1182         | 0.75 (1.07 - 0.11) | 0.08468        | 0.73 (1.05 - 0.09) | 0.09074        | 0.73 (1.05 - 0.05) |
| rs2850374                     | 0.6893         | 1.07 (1.52 - 0.58) | 0.6211         | 1.09 (1.56 - 0.67) | 0.6661         | 1.08 (1.54 - 0.59) |
| rs2850377                     | 0.09769        | 0.83 (1.03 - 0.07) | 0.06301        | 0.81 (1.01 - 0.06) | 0.05657        | 0.81 (1.01 - 0.06) |
| rs2851318                     | 0.755          | 1.06 (1.49 - 0.61) | 0.677          | 1.08 (1.53 - 0.73) | 0.7254         | 1.07 (1.52 - 0.64) |
| rs2631268                     | 0.1689         | 1.18 (1.48 - 0.14) | 0.2403         | 1.15 (1.46 - 0.15) | 0.1515         | 1.19 (1.50 - 0.14) |
| rs7685012                     | 0.7777         | 0.95 (1.32 - 0.81) | 0.9282         | 0.98 (1.37 - 0.95) | 0.9483         | 0.99 (1.38 - 0.92) |
| rs10516491                    | 0.7152         | 0.86 (1.95 - 0.61) | 0.7267         | 0.86 (1.99 - 0.85) | 0.8534         | 0.93 (2.10 - 0.75) |
| rs2658529                     | 0.3159         | 1.19 (1.68 - 0.24) | 0.4491         | 1.15 (1.63 - 0.30) | 0.2996         | 1.20 (1.70 - 0.22) |
| rs3113676                     | 0.6307         | 1.23 (2.89 - 0.95) | 0.4843         | 1.36 (3.18 - 0.51) | 0.5136         | 1.33 (3.12 - 0.48) |
| rs3113677                     | 0.6417         | 0.91 (1.38 - 0.37) | 0.8074         | 0.95 (1.45 - 0.64) | 0.6437         | 0.90 (1.39 - 0.61) |
| rs12649238                    | <b>0.03577</b> | 1.34 (1.75 - 0.06) | 0.07567        | 1.29 (1.70 - 0.04) | <b>0.04209</b> | 1.33 (1.76 - 0.07) |
| rs10516489                    | 0.08764        | 0.83 (1.03 - 0.18) | 0.08677        | 0.82 (1.03 - 0.14) | 0.1406         | 0.85 (1.06 - 0.23) |
| rs7692330                     | 0.9983         | 1.00 (1.50 - 0.84) | 0.7812         | 1.06 (1.59 - 0.87) | 0.8687         | 1.04 (1.56 - 0.94) |
| rs6816285                     | 0.4291         | 0.92 (1.13 - 0.25) | 0.506          | 0.93 (1.15 - 0.38) | 0.3812         | 0.91 (1.12 - 0.34) |
| rs1813006                     | 0.9946         | 1.00 (1.55 - 0.81) | 0.9306         | 0.98 (1.54 - 0.83) | 0.8258         | 0.95 (1.49 - 0.68) |
| rs173218                      | <b>0.01217</b> | 1.42 (1.86 - 0.04) | <b>0.02848</b> | 1.37 (1.81 - 0.02) | <b>0.01757</b> | 1.40 (1.85 - 0.03) |
| rs236768                      | <b>0.01654</b> | 1.40 (1.85 - 0.05) | <b>0.02861</b> | 1.37 (1.81 - 0.02) | <b>0.02444</b> | 1.38 (1.83 - 0.05) |

**Abbreviations:** SNP, Single Nuclear Polymorphism; P, p-value; ODDS, Odds Ratio; L95, Lower Bound of 95% Confidence Interval; U95, Upper Bound of 95% Confidence Interval

<sup>b</sup>SNPs rs17266594, rs10516487, and rs4698977 are partially imputed as described in the Materials and Methods section.

**Supplemental Table 2c.** Detailed results from the multivariate logistic regression analysis of 38 SNPs around and within BANK1 with Bioplex 2200 autoantibody data as covariate factors

| SNP                           | No Covariate   |                    | RNP A          |                    | Sm             |                    |
|-------------------------------|----------------|--------------------|----------------|--------------------|----------------|--------------------|
|                               | P              | OR (95% C.I.)      | P              | OR (95% C.I.)      | P              | OR (95% C.I.)      |
| rs4632664                     | 0.5919         | 0.89 (1.35 - 0.91) | 0.6372         | 0.90 (1.38 - 0.97) | 0.9688         | 0.99 (1.51 - 0.70) |
| rs17199964                    | 0.1474         | 0.75 (1.11 - 0.58) | 0.102          | 0.71 (1.07 - 0.22) | 0.223          | 0.78 (1.16 - 0.13) |
| rs4371620                     | 0.2507         | 0.85 (1.12 - 0.62) | 0.3314         | 0.87 (1.15 - 0.34) | 0.3444         | 0.87 (1.16 - 0.28) |
| rs11097755                    | 0.5632         | 1.07 (1.33 - 0.40) | 0.5515         | 1.07 (1.35 - 0.52) | 0.5241         | 1.08 (1.36 - 0.45) |
| rs4699258                     | 0.1278         | 0.84 (1.05 - 0.30) | 0.0785         | 0.81 (1.02 - 0.21) | 0.2127         | 0.86 (1.09 - 0.11) |
| rs9998865                     | 0.2193         | 0.81 (1.14 - 0.07) | 0.3833         | 0.86 (1.21 - 0.30) | 0.3036         | 0.83 (1.18 - 0.29) |
| rs7656409                     | <b>0.02283</b> | 0.78 (0.97 - 0.03) | <b>0.02407</b> | 0.78 (0.97 - 0.06) | 0.05926        | 0.81 (1.01 - 0.02) |
| rs6833249                     | 0.21           | 0.80 (1.13 - 0.08) | 0.3614         | 0.85 (1.21 - 0.28) | 0.2848         | 0.82 (1.18 - 0.27) |
| rs4572885                     | 0.2303         | 0.87 (1.09 - 0.29) | 0.1711         | 0.85 (1.07 - 0.29) | 0.2865         | 0.88 (1.11 - 0.16) |
| <b>rs17266594<sup>b</sup></b> | 0.2701         | 0.88 (1.11 - 0.48) | 0.1928         | 0.85 (1.09 - 0.42) | 0.4184         | 0.90 (1.15 - 0.18) |
| <b>rs10516487<sup>b</sup></b> | 0.2701         | 0.88 (1.11 - 0.48) | 0.1928         | 0.85 (1.09 - 0.42) | 0.4184         | 0.90 (1.15 - 0.18) |
| rs10516486                    | 0.4058         | 0.91 (1.14 - 0.50) | 0.4096         | 0.91 (1.14 - 0.61) | 0.6131         | 0.94 (1.19 - 0.25) |
| rs1469019                     | 0.6672         | 1.10 (1.69 - 1.00) | 0.4222         | 1.20 (1.86 - 0.61) | 0.6058         | 1.12 (1.76 - 0.82) |
| rs11931658                    | 0.1945         | 0.86 (1.08 - 0.17) | 0.1198         | 0.83 (1.05 - 0.18) | 0.1784         | 0.85 (1.08 - 0.06) |
| rs12498977                    | 0.9224         | 1.02 (1.60 - 0.66) | 0.6797         | 1.10 (1.75 - 0.91) | 0.913          | 1.03 (1.64 - 0.98) |
| <b>rs4698977<sup>b</sup></b>  | 0.07106        | 0.81 (1.02 - 0.15) | <b>0.04117</b> | 0.78 (0.99 - 0.11) | 0.1095         | 0.83 (1.04 - 0.02) |
| rs12331849                    | 0.1095         | 0.84 (1.04 - 0.16) | 0.1001         | 0.83 (1.04 - 0.18) | 0.1811         | 0.86 (1.07 - 0.04) |
| rs3733197                     | 0.05854        | 0.80 (1.01 - 0.11) | <b>0.02745</b> | 0.77 (0.97 - 0.06) | 0.06307        | 0.80 (1.01 - 0.02) |
| rs10014485                    | 0.4446         | 0.87 (1.24 - 0.64) | 0.4937         | 0.88 (1.27 - 0.55) | 0.5526         | 0.90 (1.29 - 0.59) |
| rs12331595                    | 0.0823         | 0.82 (1.03 - 0.16) | 0.06426        | 0.81 (1.01 - 0.15) | 0.1504         | 0.85 (1.06 - 0.03) |
| rs17208914                    | 0.1692         | 1.16 (1.44 - 0.15) | 0.1312         | 1.19 (1.48 - 0.21) | 0.2131         | 1.15 (1.44 - 0.03) |
| rs13125328                    | 0.1182         | 0.75 (1.07 - 0.11) | 0.05045        | 0.69 (1.00 - 0.14) | 0.1375         | 0.76 (1.09 - 0.15) |
| rs2850374                     | 0.6893         | 1.07 (1.52 - 0.58) | 0.5906         | 1.10 (1.58 - 0.48) | 0.4841         | 1.14 (1.62 - 0.92) |
| rs2850377                     | 0.09769        | 0.83 (1.03 - 0.07) | 0.06088        | 0.81 (1.01 - 0.10) | 0.1008         | 0.83 (1.04 - 0.03) |
| rs2851318                     | 0.755          | 1.06 (1.49 - 0.61) | 0.6392         | 1.09 (1.55 - 0.53) | 0.5296         | 1.12 (1.60 - 0.96) |
| rs2631268                     | 0.1689         | 1.18 (1.48 - 0.14) | 0.1429         | 1.20 (1.52 - 0.24) | 0.2374         | 1.16 (1.47 - 0.12) |
| rs7685012                     | 0.7777         | 0.95 (1.32 - 0.81) | 0.9191         | 1.02 (1.42 - 0.80) | 0.8041         | 0.96 (1.34 - 0.99) |
| rs10516491                    | 0.7152         | 0.86 (1.95 - 0.61) | 0.7511         | 0.87 (2.03 - 0.66) | 0.6557         | 0.82 (1.95 - 0.31) |
| rs2658529                     | 0.3159         | 1.19 (1.68 - 0.24) | 0.2201         | 1.25 (1.78 - 0.41) | 0.4059         | 1.16 (1.66 - 0.21) |
| rs3113676                     | 0.6307         | 1.23 (2.89 - 0.95) | 0.4837         | 1.36 (3.23 - 0.39) | 0.3921         | 1.45 (3.41 - 0.38) |
| rs3113677                     | 0.6417         | 0.91 (1.38 - 0.37) | 0.607          | 0.89 (1.38 - 0.67) | 0.6679         | 0.91 (1.41 - 0.53) |
| rs12649238                    | <b>0.03577</b> | 1.34 (1.75 - 0.06) | 0.06658        | 1.30 (1.73 - 0.08) | 0.07529        | 1.29 (1.72 - 0.05) |
| rs10516489                    | 0.08764        | 0.83 (1.03 - 0.18) | 0.2279         | 0.87 (1.09 - 0.13) | 0.1347         | 0.84 (1.06 - 0.27) |
| rs7692330                     | 0.9983         | 1.00 (1.50 - 0.84) | 0.9431         | 1.02 (1.54 - 0.88) | 0.8797         | 1.03 (1.57 - 0.77) |
| rs6816285                     | 0.4291         | 0.92 (1.13 - 0.25) | 0.336          | 0.90 (1.12 - 0.49) | 0.4897         | 0.93 (1.15 - 0.26) |
| rs1813006                     | 0.9946         | 1.00 (1.55 - 0.81) | 0.6848         | 0.91 (1.44 - 0.97) | 0.9651         | 0.99 (1.56 - 0.72) |
| rs173218                      | <b>0.01217</b> | 1.42 (1.86 - 0.04) | <b>0.02899</b> | 1.37 (1.82 - 0.05) | <b>0.04793</b> | 1.33 (1.78 - 0.03) |
| rs236768                      | <b>0.01654</b> | 1.40 (1.85 - 0.05) | <b>0.0468</b>  | 1.34 (1.78 - 0.04) | <b>0.0398</b>  | 1.35 (1.80 - 0.03) |

**Abbreviations:** SNP, Single Nuclear Polymorphism; P, p-value; ODDS, Odds Ratio; L95, Lower Bound of 95% Confidence Interval; U95, Upper Bound of 95% Confidence Interval

<sup>b</sup>SNPs rs17266594, rs10516487, and rs4698977 are partially imputed as described in the Materials and Methods section.

**Supplemental Table 2d.** Detailed results from the multivariate logistic regression analysis of 38 SNPs around and within BANK1 with Bioplex 2200 autoantibody data as covariate factors

| SNP                           | No Covariate   |                    | SmRNP          |                    | SS-A52/Ro 52kD |                    |
|-------------------------------|----------------|--------------------|----------------|--------------------|----------------|--------------------|
|                               | P              | OR (95% C.I.)      | P              | OR (95% C.I.)      | P              | OR (95% C.I.)      |
| rs4632664                     | 0.5919         | 0.89 (1.35 - 0.91) | 0.704          | 0.92 (1.42 - 0.72) | 0.7228         | 0.93 (1.42 - 0.70) |
| rs17199964                    | 0.1474         | 0.75 (1.11 - 0.58) | 0.1309         | 0.72 (1.10 - 0.40) | 0.3994         | 0.84 (1.26 - 0.23) |
| rs4371620                     | 0.2507         | 0.85 (1.12 - 0.62) | 0.2771         | 0.85 (1.14 - 0.29) | 0.289          | 0.86 (1.14 - 0.29) |
| rs11097755                    | 0.5632         | 1.07 (1.33 - 0.40) | 0.4521         | 1.09 (1.39 - 0.74) | 0.7352         | 1.04 (1.31 - 0.74) |
| rs4699258                     | 0.1278         | 0.84 (1.05 - 0.30) | 0.1143         | 0.82 (1.05 - 0.11) | 0.1091         | 0.82 (1.05 - 0.19) |
| rs9998865                     | 0.2193         | 0.81 (1.14 - 0.07) | 0.2926         | 0.82 (1.18 - 0.21) | 0.2119         | 0.79 (1.14 - 0.19) |
| rs7656409                     | <b>0.02283</b> | 0.78 (0.97 - 0.03) | <b>0.02418</b> | 0.77 (0.97 - 0.02) | <b>0.01732</b> | 0.76 (0.95 - 0.03) |
| rs6833249                     | 0.21           | 0.80 (1.13 - 0.08) | 0.2694         | 0.81 (1.17 - 0.19) | 0.1949         | 0.79 (1.13 - 0.17) |
| rs4572885                     | 0.2303         | 0.87 (1.09 - 0.29) | 0.1605         | 0.84 (1.07 - 0.25) | 0.249          | 0.87 (1.10 - 0.37) |
| <b>rs17266594<sup>b</sup></b> | 0.2701         | 0.88 (1.11 - 0.48) | 0.1833         | 0.84 (1.08 - 0.23) | 0.2325         | 0.86 (1.10 - 0.47) |
| <b>rs10516487<sup>b</sup></b> | 0.2701         | 0.88 (1.11 - 0.48) | 0.1833         | 0.84 (1.08 - 0.23) | 0.2325         | 0.86 (1.10 - 0.47) |
| rs10516486                    | 0.4058         | 0.91 (1.14 - 0.50) | 0.25           | 0.87 (1.10 - 0.42) | 0.4186         | 0.91 (1.15 - 0.60) |
| rs1469019                     | 0.6672         | 1.10 (1.69 - 1.00) | 0.8205         | 1.06 (1.68 - 0.52) | 0.5186         | 1.16 (1.82 - 0.74) |
| rs11931658                    | 0.1945         | 0.86 (1.08 - 0.17) | 0.05645        | 0.79 (1.01 - 0.21) | 0.2093         | 0.86 (1.09 - 0.32) |
| rs12498977                    | 0.9224         | 1.02 (1.60 - 0.66) | 0.9776         | 1.01 (1.63 - 0.98) | 0.9843         | 1.00 (1.61 - 0.65) |
| <b>rs4698977<sup>b</sup></b>  | 0.07106        | 0.81 (1.02 - 0.15) | <b>0.02248</b> | 0.75 (0.96 - 0.08) | 0.08264        | 0.81 (1.03 - 0.12) |
| rs12331849                    | 0.1095         | 0.84 (1.04 - 0.16) | <b>0.04019</b> | 0.78 (0.99 - 0.15) | 0.1491         | 0.84 (1.06 - 0.15) |
| rs3733197                     | 0.05854        | 0.80 (1.01 - 0.11) | <b>0.01714</b> | 0.74 (0.95 - 0.07) | 0.07027        | 0.80 (1.02 - 0.09) |
| rs10014485                    | 0.4446         | 0.87 (1.24 - 0.64) | 0.5878         | 0.90 (1.31 - 0.36) | 0.3605         | 0.84 (1.22 - 0.69) |
| rs12331595                    | 0.0823         | 0.82 (1.03 - 0.16) | <b>0.02507</b> | 0.77 (0.97 - 0.08) | 0.08038        | 0.81 (1.03 - 0.06) |
| rs17208914                    | 0.1692         | 1.16 (1.44 - 0.15) | <b>0.03366</b> | 1.28 (1.61 - 0.16) | 0.16           | 1.17 (1.47 - 0.14) |
| rs13125328                    | 0.1182         | 0.75 (1.07 - 0.11) | 0.1488         | 0.75 (1.11 - 0.16) | 0.1555         | 0.76 (1.11 - 0.20) |
| rs2850374                     | 0.6893         | 1.07 (1.52 - 0.58) | 0.9156         | 1.02 (1.49 - 0.73) | 0.7327         | 1.07 (1.53 - 0.95) |
| rs2850377                     | 0.09769        | 0.83 (1.03 - 0.07) | <b>0.02556</b> | 0.77 (0.97 - 0.10) | 0.102          | 0.83 (1.04 - 0.14) |
| rs2851318                     | 0.755          | 1.06 (1.49 - 0.61) | 0.9605         | 1.01 (1.47 - 0.78) | 0.7807         | 1.05 (1.51 - 0.91) |
| rs2631268                     | 0.1689         | 1.18 (1.48 - 0.14) | 0.1238         | 1.21 (1.55 - 0.35) | 0.3452         | 1.12 (1.43 - 0.64) |
| rs7685012                     | 0.7777         | 0.95 (1.32 - 0.81) | 0.9932         | 1.00 (1.41 - 0.90) | 0.8998         | 0.98 (1.37 - 0.71) |
| rs10516491                    | 0.7152         | 0.86 (1.95 - 0.61) | 0.3082         | 0.60 (1.60 - 0.48) | 0.4811         | 0.73 (1.77 - 0.47) |
| rs2658529                     | 0.3159         | 1.19 (1.68 - 0.24) | 0.2078         | 1.26 (1.81 - 0.49) | 0.4852         | 1.14 (1.63 - 0.63) |
| rs3113676                     | 0.6307         | 1.23 (2.89 - 0.95) | 0.3843         | 1.47 (3.52 - 0.72) | 0.7157         | 1.18 (2.90 - 0.54) |
| rs3113677                     | 0.6417         | 0.91 (1.38 - 0.37) | 0.5349         | 0.87 (1.36 - 0.59) | 0.5909         | 0.89 (1.38 - 0.68) |
| rs12649238                    | <b>0.03577</b> | 1.34 (1.75 - 0.06) | 0.0504         | 1.33 (1.78 - 0.11) | 0.1133         | 1.26 (1.68 - 0.19) |
| rs10516489                    | 0.08764        | 0.83 (1.03 - 0.18) | 0.2729         | 0.88 (1.11 - 0.06) | 0.06413        | 0.81 (1.01 - 0.05) |
| rs7692330                     | 0.9983         | 1.00 (1.50 - 0.84) | 0.7678         | 1.07 (1.63 - 0.98) | 0.9836         | 1.00 (1.52 - 0.69) |
| rs6816285                     | 0.4291         | 0.92 (1.13 - 0.25) | 0.255          | 0.88 (1.10 - 0.82) | 0.8157         | 0.97 (1.21 - 0.93) |
| rs1813006                     | 0.9946         | 1.00 (1.55 - 0.81) | 0.7217         | 0.92 (1.48 - 0.66) | 0.6621         | 1.11 (1.74 - 0.52) |
| rs173218                      | <b>0.01217</b> | 1.42 (1.86 - 0.04) | <b>0.02688</b> | 1.39 (1.85 - 0.05) | 0.05307        | 1.33 (1.77 - 0.10) |
| rs236768                      | <b>0.01654</b> | 1.40 (1.85 - 0.05) | <b>0.02642</b> | 1.39 (1.87 - 0.04) | <b>0.04081</b> | 1.35 (1.80 - 0.06) |

**Abbreviations:** SNP, Single Nuclear Polymorphism; P, p-value; ODDS, Odds Ratio; L95, Lower Bound of 95% Confidence Interval; U95, Upper Bound of 95% Confidence Interval

<sup>b</sup>SNPs rs17266594, rs10516487, and rs4698977 are partially imputed as described in the Materials and Methods section.

**Supplemental Table 2e.** Detailed results from the multivariate logistic regression analysis of 38 SNPs around and within BANK1 with Bioplex 2200 autoantibody data as covariate factors

| SNP                           | No Covariate   |                    | SS-A60/Ro 60kD |                    | SS-B/La        |                    |
|-------------------------------|----------------|--------------------|----------------|--------------------|----------------|--------------------|
|                               | P              | OR (95% C.I.)      | P              | OR (95% C.I.)      | P              | OR (95% C.I.)      |
| rs4632664                     | 0.5919         | 0.89 (1.35 - 0.91) | 0.6997         | 0.92 (1.43 - 0.57) | 0.5681         | 0.88 (1.36 - 0.00) |
| rs17199964                    | 0.1474         | 0.75 (1.11 - 0.58) | 0.2258         | 0.77 (1.17 - 0.33) | 0.3312         | 0.82 (1.22 - 0.00) |
| rs4371620                     | 0.2507         | 0.85 (1.12 - 0.62) | 0.2864         | 0.85 (1.14 - 0.25) | 0.2467         | 0.85 (1.12 - 0.00) |
| rs11097755                    | 0.5632         | 1.07 (1.33 - 0.40) | 0.7393         | 1.04 (1.32 - 0.83) | 0.8333         | 1.03 (1.29 - 0.00) |
| rs4699258                     | 0.1278         | 0.84 (1.05 - 0.30) | 0.1927         | 0.85 (1.09 - 0.12) | 0.1174         | 0.83 (1.05 - 0.00) |
| rs9998865                     | 0.2193         | 0.81 (1.14 - 0.07) | 0.1919         | 0.78 (1.13 - 0.18) | 0.1752         | 0.78 (1.12 - 0.00) |
| rs7656409                     | <b>0.02283</b> | 0.78 (0.97 - 0.03) | <b>0.0333</b>  | 0.78 (0.98 - 0.02) | <b>0.01573</b> | 0.76 (0.95 - 0.00) |
| rs6833249                     | 0.21           | 0.80 (1.13 - 0.08) | 0.1719         | 0.77 (1.12 - 0.16) | 0.1614         | 0.77 (1.11 - 0.00) |
| rs4572885                     | 0.2303         | 0.87 (1.09 - 0.29) | 0.3733         | 0.90 (1.14 - 0.22) | 0.2161         | 0.86 (1.09 - 0.00) |
| <b>rs17266594<sup>b</sup></b> | 0.2701         | 0.88 (1.11 - 0.48) | 0.4672         | 0.91 (1.17 - 0.25) | 0.2475         | 0.87 (1.11 - 0.00) |
| <b>rs10516487<sup>b</sup></b> | 0.2701         | 0.88 (1.11 - 0.48) | 0.4672         | 0.91 (1.17 - 0.25) | 0.2475         | 0.87 (1.11 - 0.00) |
| rs10516486                    | 0.4058         | 0.91 (1.14 - 0.50) | 0.5985         | 0.94 (1.19 - 0.35) | 0.3457         | 0.89 (1.13 - 0.00) |
| rs1469019                     | 0.6672         | 1.10 (1.69 - 1.00) | 0.739          | 1.08 (1.73 - 0.75) | 0.7483         | 1.08 (1.69 - 0.00) |
| rs11931658                    | 0.1945         | 0.86 (1.08 - 0.17) | 0.3192         | 0.88 (1.13 - 0.23) | 0.2291         | 0.86 (1.10 - 0.00) |
| rs12498977                    | 0.9224         | 1.02 (1.60 - 0.66) | 0.65           | 0.89 (1.47 - 0.82) | 0.8168         | 0.94 (1.53 - 0.00) |
| <b>rs4698977<sup>b</sup></b>  | 0.07106        | 0.81 (1.02 - 0.15) | 0.1222         | 0.83 (1.05 - 0.09) | 0.0913         | 0.82 (1.03 - 0.00) |
| rs12331849                    | 0.1095         | 0.84 (1.04 - 0.16) | 0.1467         | 0.84 (1.06 - 0.12) | 0.1202         | 0.83 (1.05 - 0.00) |
| rs3733197                     | 0.05854        | 0.80 (1.01 - 0.11) | 0.08719        | 0.81 (1.03 - 0.07) | 0.07217        | 0.81 (1.02 - 0.00) |
| rs10014485                    | 0.4446         | 0.87 (1.24 - 0.64) | 0.6874         | 0.93 (1.35 - 0.35) | 0.3467         | 0.84 (1.21 - 0.00) |
| rs12331595                    | 0.0823         | 0.82 (1.03 - 0.16) | 0.05627        | 0.79 (1.01 - 0.07) | 0.0682         | 0.81 (1.02 - 0.00) |
| rs17208914                    | 0.1692         | 1.16 (1.44 - 0.15) | 0.135          | 1.19 (1.49 - 0.14) | 0.1429         | 1.18 (1.47 - 0.00) |
| rs13125328                    | 0.1182         | 0.75 (1.07 - 0.11) | 0.198          | 0.78 (1.14 - 0.12) | 0.1194         | 0.74 (1.08 - 0.00) |
| rs2850374                     | 0.6893         | 1.07 (1.52 - 0.58) | 0.9486         | 0.99 (1.44 - 0.84) | 0.8356         | 1.04 (1.50 - 0.00) |
| rs2850377                     | 0.09769        | 0.83 (1.03 - 0.07) | 0.1405         | 0.84 (1.06 - 0.10) | 0.1049         | 0.83 (1.04 - 0.00) |
| rs2851318                     | 0.755          | 1.06 (1.49 - 0.61) | 0.9121         | 0.98 (1.43 - 0.89) | 0.8869         | 1.03 (1.47 - 0.00) |
| rs2631268                     | 0.1689         | 1.18 (1.48 - 0.14) | 0.6429         | 1.06 (1.36 - 0.31) | 0.3129         | 1.13 (1.44 - 0.00) |
| rs7685012                     | 0.7777         | 0.95 (1.32 - 0.81) | 0.7122         | 0.94 (1.33 - 0.88) | 0.8826         | 1.03 (1.43 - 0.00) |
| rs10516491                    | 0.7152         | 0.86 (1.95 - 0.61) | 0.4678         | 0.71 (1.80 - 0.75) | 0.7545         | 0.87 (2.04 - 0.00) |
| rs2658529                     | 0.3159         | 1.19 (1.68 - 0.24) | 0.6264         | 1.10 (1.59 - 0.56) | 0.564          | 1.11 (1.59 - 0.00) |
| rs3113676                     | 0.6307         | 1.23 (2.89 - 0.95) | 0.5448         | 1.32 (3.26 - 0.75) | 0.7501         | 1.16 (2.84 - 0.00) |
| rs3113677                     | 0.6417         | 0.91 (1.38 - 0.37) | 0.675          | 0.91 (1.43 - 0.46) | 0.4607         | 0.85 (1.32 - 0.00) |
| rs12649238                    | <b>0.03577</b> | 1.34 (1.75 - 0.06) | 0.191          | 1.22 (1.64 - 0.12) | 0.123          | 1.25 (1.66 - 0.00) |
| rs10516489                    | 0.08764        | 0.83 (1.03 - 0.18) | 0.05147        | 0.79 (1.00 - 0.10) | 0.1027         | 0.83 (1.04 - 0.00) |
| rs7692330                     | 0.9983         | 1.00 (1.50 - 0.84) | 0.6876         | 1.09 (1.67 - 0.98) | 0.9826         | 1.00 (1.52 - 0.00) |
| rs6816285                     | 0.4291         | 0.92 (1.13 - 0.25) | 0.9277         | 1.01 (1.26 - 0.65) | 0.6473         | 0.95 (1.18 - 0.00) |
| rs1813006                     | 0.9946         | 1.00 (1.55 - 0.81) | 0.5181         | 1.16 (1.85 - 0.83) | 0.8322         | 1.05 (1.65 - 0.00) |
| rs173218                      | <b>0.01217</b> | 1.42 (1.86 - 0.04) | 0.09592        | 1.29 (1.74 - 0.04) | <b>0.04242</b> | 1.34 (1.79 - 0.00) |
| rs236768                      | <b>0.01654</b> | 1.40 (1.85 - 0.05) | 0.06211        | 1.33 (1.79 - 0.04) | <b>0.0378</b>  | 1.36 (1.81 - 0.00) |

**Abbreviations:** SNP, Single Nuclear Polymorphism; P, p-value; ODDS, Odds Ratio; L95, Lower Bound of 95% Confidence Interval; U95, Upper Bound of 95% Confidence Interval

<sup>b</sup>SNPs rs17266594, rs10516487, and rs4698977 are partially imputed as described in the Materials and Methods section.



Type of file: table

Label: Table 3

Filename: BANK1\_Supplemental\_Table3.pdf

**Supplemental Table 3a.** Detailed results from subsetting association analysis using 10 ACR clinical criteria to stratify SLE cases.

| SNP                     | BP        | No subsetting (1892/2652)* |          |             |                 |                  | ANA (1318/2652) |          |             |                 |                  | Arthritis (1157/2652) |          |             |                 |                  |
|-------------------------|-----------|----------------------------|----------|-------------|-----------------|------------------|-----------------|----------|-------------|-----------------|------------------|-----------------------|----------|-------------|-----------------|------------------|
|                         |           | Minor Allele               | MAF Case | MAF Control | P               | OR (95% C.I.)    | Minor Allele    | MAF Case | MAF Control | P               | OR (95% C.I.)    | Minor Allele          | MAF Case | MAF Control | P               | OR (95% C.I.)    |
| rs4632664               | 102911688 | A                          | 0.06323  | 0.06738     | 4.31E-01        | 0.93 (0.79-1.11) | A               | 0.06497  | 0.06738     | 6.85E-01        | 0.96 (0.8-1.16)  | A                     | 0.06358  | 0.0674      | 5.40E-01        | 0.94 (0.77-1.15) |
| rs17199964              | 102926814 | A                          | 0.07373  | 0.08503     | 5.08E-02        | 0.86 (0.73-1)    | A               | 0.07549  | 0.08503     | 1.44E-01        | 0.88 (0.74-1.05) | A                     | 0.07692  | 0.085       | 2.37E-01        | 0.9 (0.75-1.07)  |
| rs4371620               | 102927258 | G                          | 0.1936   | 0.2156      | <b>1.08E-02</b> | 0.87 (0.79-0.97) | G               | 0.2021   | 0.2156      | 1.66E-01        | 0.92 (0.82-1.04) | G                     | 0.2042   | 0.2156      | 2.64E-01        | 0.93 (0.83-1.05) |
| rs11097755              | 102928331 | G                          | 0.4407   | 0.454       | 2.10E-01        | 0.95 (0.87-1.03) | G               | 0.4494   | 0.454       | 7.02E-01        | 0.98 (0.89-1.08) | G                     | 0.4545   | 0.454       | 9.64E-01        | 1 (0.91-1.11)    |
| rs4699258               | 102929711 | A                          | 0.2968   | 0.3326      | <b>3.09E-04</b> | 0.85 (0.77-0.93) | A               | 0.2971   | 0.3326      | <b>1.44E-03</b> | 0.85 (0.77-0.94) | A                     | 0.2978   | 0.3326      | <b>2.86E-03</b> | 0.85 (0.77-0.95) |
| rs9998865               | 102936169 | C                          | 0.1007   | 0.1018      | 8.68E-01        | 0.99 (0.86-1.14) | C               | 0.1036   | 0.1018      | 8.00E-01        | 1.02 (0.87-1.19) | C                     | 0.1007   | 0.1018      | 8.82E-01        | 0.99 (0.84-1.16) |
| rs7656409               | 102943428 | A                          | 0.3977   | 0.4338      | <b>5.85E-04</b> | 0.86 (0.79-0.94) | A               | 0.4036   | 0.4338      | <b>1.04E-02</b> | 0.88 (0.8-0.97)  | A                     | 0.4015   | 0.4338      | <b>8.59E-03</b> | 0.88 (0.79-0.97) |
| rs6833249               | 102945096 | A                          | 0.0981   | 0.09936     | 8.42E-01        | 0.99 (0.86-1.13) | A               | 0.1021   | 0.09936     | 6.99E-01        | 1.03 (0.88-1.2)  | A                     | 0.09948  | 0.0994      | 9.87E-01        | 1 (0.85-1.18)    |
| rs4572885               | 102954536 | T                          | 0.3694   | 0.396       | <b>1.01E-02</b> | 0.89 (0.82-0.97) | T               | 0.3683   | 0.396       | <b>1.67E-02</b> | 0.89 (0.81-0.98) | T                     | 0.3681   | 0.396       | <b>2.13E-02</b> | 0.89 (0.8-0.98)  |
| rs17266594 <sup>b</sup> | 102969945 | C                          | 0.2891   | 0.3309      | <b>2.32E-05</b> | 0.82 (0.75-0.9)  | C               | 0.2887   | 0.3309      | <b>1.42E-04</b> | 0.82 (0.74-0.91) | C                     | 0.2908   | 0.3309      | <b>5.62E-04</b> | 0.83 (0.75-0.92) |
| rs10516487 <sup>b</sup> | 102970099 | T                          | 0.2896   | 0.3309      | <b>2.95E-05</b> | 0.82 (0.75-0.9)  | T               | 0.2887   | 0.3309      | <b>1.42E-04</b> | 0.82 (0.74-0.91) | T                     | 0.2908   | 0.3309      | <b>5.62E-04</b> | 0.83 (0.75-0.92) |
| rs10516486              | 102970299 | A                          | 0.3562   | 0.3929      | <b>3.84E-04</b> | 0.86 (0.78-0.93) | A               | 0.357    | 0.3929      | <b>1.93E-03</b> | 0.86 (0.78-0.95) | A                     | 0.3583   | 0.3929      | <b>4.25E-03</b> | 0.86 (0.78-0.95) |
| rs1469019               | 102977483 | A                          | 0.06734  | 0.06205     | 3.12E-01        | 1.09 (0.92-1.29) | A               | 0.0692   | 0.06205     | 2.22E-01        | 1.12 (0.93-1.36) | A                     | 0.06834  | 0.0621      | 3.03E-01        | 1.11 (0.91-1.35) |
| rs11931658              | 102985915 | G                          | 0.3287   | 0.3632      | <b>6.63E-04</b> | 0.86 (0.79-0.94) | G               | 0.3383   | 0.3632      | <b>2.90E-02</b> | 0.9 (0.81-0.99)  | G                     | 0.3414   | 0.3632      | 6.82E-02        | 0.91 (0.82-1.01) |
| rs12498977              | 102988700 | A                          | 0.06448  | 0.06222     | 6.62E-01        | 1.04 (0.88-1.23) | A               | 0.06335  | 0.06222     | 8.44E-01        | 1.02 (0.84-1.24) | A                     | 0.06266  | 0.0622      | 9.41E-01        | 1.01 (0.82-1.23) |
| rs4698977 <sup>b</sup>  | 103006446 | T                          | 0.3647   | 0.4065      | <b>5.62E-05</b> | 0.84 (0.77-0.91) | T               | 0.3733   | 0.4065      | <b>4.39E-03</b> | 0.87 (0.79-0.96) | T                     | 0.3729   | 0.4065      | <b>5.92E-03</b> | 0.87 (0.79-0.96) |
| rs12331849              | 103009841 | A                          | 0.4232   | 0.4638      | <b>1.29E-04</b> | 0.85 (0.78-0.92) | A               | 0.4338   | 0.4638      | <b>1.17E-02</b> | 0.89 (0.81-0.97) | A                     | 0.4333   | 0.4638      | <b>1.42E-02</b> | 0.88 (0.8-0.98)  |
| rs3733197               | 103058310 | A                          | 0.3428   | 0.3711      | <b>5.69E-03</b> | 0.88 (0.81-0.96) | A               | 0.3459   | 0.3711      | <b>2.84E-02</b> | 0.9 (0.81-0.99)  | A                     | 0.3461   | 0.3711      | <b>3.70E-02</b> | 0.9 (0.81-0.99)  |
| rs10014485              | 103058902 | G                          | 0.1003   | 0.09864     | 7.99E-01        | 1.02 (0.89-1.17) | G               | 0.101    | 0.09864     | 7.42E-01        | 1.03 (0.88-1.2)  | G                     | 0.1037   | 0.0986      | 4.98E-01        | 1.06 (0.9-1.24)  |
| rs12331595              | 103068242 | A                          | 0.4532   | 0.4874      | <b>1.31E-03</b> | 0.87 (0.8-0.95)  | A               | 0.4613   | 0.4874      | <b>2.86E-02</b> | 0.9 (0.82-0.99)  | A                     | 0.4585   | 0.4874      | <b>2.05E-02</b> | 0.89 (0.81-0.98) |
| rs17208914              | 103073413 | G                          | 0.4685   | 0.4436      | <b>1.87E-02</b> | 1.11 (1.02-1.2)  | G               | 0.4617   | 0.4436      | 1.28E-01        | 1.08 (0.98-1.18) | G                     | 0.4633   | 0.4436      | 1.12E-01        | 1.08 (0.98-1.19) |
| rs13125328              | 103074133 | C                          | 0.1032   | 0.1111      | 2.31E-01        | 0.92 (0.8-1.05)  | C               | 0.09992  | 0.1111      | 1.30E-01        | 0.89 (0.76-1.04) | C                     | 0.1034   | 0.1111      | 3.20E-01        | 0.92 (0.79-1.08) |
| rs2850374               | 103112346 | C                          | 0.1104   | 0.116       | 4.05E-01        | 0.95 (0.83-1.08) | C               | 0.1162   | 0.116       | 9.79E-01        | 1 (0.87-1.16)    | C                     | 0.1129   | 0.116       | 6.98E-01        | 0.97 (0.83-1.13) |
| rs2850377               | 103131182 | A                          | 0.4174   | 0.438       | 5.11E-02        | 0.92 (0.85-1)    | A               | 0.4186   | 0.438       | 1.02E-01        | 0.92 (0.84-1.02) | A                     | 0.4195   | 0.438       | 1.34E-01        | 0.93 (0.84-1.02) |
| rs2851318               | 103134691 | T                          | 0.1118   | 0.1177      | 3.85E-01        | 0.94 (0.83-1.08) | T               | 0.1176   | 0.1177      | 9.91E-01        | 1 (0.86-1.16)    | T                     | 0.1154   | 0.1177      | 7.73E-01        | 0.98 (0.84-1.14) |
| rs2631268               | 103167753 | A                          | 0.2824   | 0.2655      | 7.38E-02        | 1.09 (0.99-1.2)  | A               | 0.2795   | 0.2655      | 1.86E-01        | 1.07 (0.97-1.19) | A                     | 0.2736   | 0.2655      | 4.62E-01        | 1.04 (0.93-1.16) |
| rs7685012               | 103168014 | G                          | 0.1126   | 0.1107      | 7.69E-01        | 1.02 (0.89-1.16) | G               | 0.112    | 0.1107      | 8.60E-01        | 1.01 (0.87-1.18) | G                     | 0.1125   | 0.1107      | 8.20E-01        | 1.02 (0.87-1.19) |
| rs10516491              | 103171889 | G                          | 0.02035  | 0.02093     | 8.49E-01        | 0.97 (0.72-1.3)  | G               | 0.01935  | 0.02093     | 6.39E-01        | 0.92 (0.66-1.29) | G                     | 0.01945  | 0.0209      | 6.75E-01        | 0.93 (0.65-1.32) |
| rs2658529               | 103183468 | G                          | 0.115    | 0.1007      | <b>2.97E-02</b> | 1.16 (1.02-1.33) | G               | 0.1104   | 0.1007      | 1.82E-01        | 1.11 (0.95-1.29) | G                     | 0.1137   | 0.1007      | 8.88E-02        | 1.15 (0.98-1.34) |
| rs3113676               | 103184066 | A                          | 0.01163  | 0.01471     | 2.09E-01        | 0.79 (0.54-1.14) | A               | 0.0129   | 0.01471     | 5.20E-01        | 0.88 (0.58-1.31) | A                     | 0.01296  | 0.0147      | 5.54E-01        | 0.88 (0.58-1.35) |
| rs3113677               | 103189210 | A                          | 0.05147  | 0.06127     | <b>4.80E-02</b> | 0.83 (0.69-1)    | A               | 0.05376  | 0.06127     | 1.83E-01        | 0.87 (0.71-1.07) | A                     | 0.05298  | 0.0613      | 1.59E-01        | 0.86 (0.69-1.06) |
| rs12649238              | 103193010 | C                          | 0.193    | 0.18        | 1.16E-01        | 1.09 (0.98-1.21) | C               | 0.1902   | 0.18        | 2.70E-01        | 1.07 (0.95-1.21) | C                     | 0.1851   | 0.18        | 5.95E-01        | 1.04 (0.91-1.17) |
| rs10516489              | 103193382 | A                          | 0.3997   | 0.3993      | 9.68E-01        | 1 (0.92-1.09)    | A               | 0.3979   | 0.3993      | 9.01E-01        | 0.99 (0.9-1.09)  | A                     | 0.4067   | 0.3993      | 5.48E-01        | 1.03 (0.93-1.14) |
| rs7692330               | 103216356 | A                          | 0.0624   | 0.06957     | 1.77E-01        | 0.89 (0.75-1.05) | A               | 0.06682  | 0.06957     | 6.48E-01        | 0.96 (0.8-1.15)  | A                     | 0.06531  | 0.0696      | 4.98E-01        | 0.93 (0.77-1.14) |
| rs6816285               | 103218632 | A                          | 0.412    | 0.4306      | 7.70E-02        | 0.93 (0.85-1.01) | A               | 0.4169   | 0.4306      | 2.46E-01        | 0.95 (0.86-1.04) | A                     | 0.4144   | 0.4306      | 1.90E-01        | 0.94 (0.85-1.03) |
| rs1813006               | 103220672 | A                          | 0.05946  | 0.06618     | 1.95E-01        | 0.89 (0.75-1.06) | A               | 0.06032  | 0.06618     | 3.16E-01        | 0.91 (0.75-1.1)  | A                     | 0.06137  | 0.0662      | 4.33E-01        | 0.92 (0.75-1.13) |
| rs173218                | 103242072 | A                          | 0.1929   | 0.1786      | 8.20E-02        | 1.1 (0.99-1.22)  | A               | 0.1893   | 0.1786      | 2.43E-01        | 1.07 (0.95-1.21) | A                     | 0.1832   | 0.1786      | 6.25E-01        | 1.03 (0.91-1.17) |
| rs236768                | 103295006 | G                          | 0.1918   | 0.1799      | 1.51E-01        | 1.08 (0.97-1.2)  | G               | 0.1858   | 0.1799      | 5.24E-01        | 1.04 (0.92-1.17) | G                     | 0.1814   | 0.1799      | 8.80E-01        | 1.01 (0.89-1.15) |

Abbreviation: SNP, Single Nuclear Polymorphism; BP, Base Position; MAF Case, Minor Allele Frequency in cases; MAF Control, Minor Allele Frequency in Controls; P, p-value; OR, Odds Ratio; C.I., Confidence Interval

<sup>b</sup>SNPs rs17266594, rs10516487, and rs4698977 are partially imputed as described in the Materials and Methods section.

\* (# cases/# controls)

**Supplemental Table3b.** Detailed results from subsetting association analysis using 10 ACR clinical criteria to stratify SLE cases.

| SNP                           | BP        | No subsetting (1892/2652)* |          |             |                 |                  | Discoid Rash (354/2652) |          |             |          |                  | Malar Rash (886/2652) |          |             |                 |                  |
|-------------------------------|-----------|----------------------------|----------|-------------|-----------------|------------------|-------------------------|----------|-------------|----------|------------------|-----------------------|----------|-------------|-----------------|------------------|
|                               |           | Minor Allele               | MAF Case | MAF Control | P               | OR (95% C.I.)    | Minor Allele            | MAF Case | MAF Control | P        | OR (95% C.I.)    | Minor Allele          | MAF Case | MAF Control | P               | OR (95% C.I.)    |
| rs4632664                     | 102911688 | A                          | 0.06323  | 0.06738     | 4.31E-01        | 0.93 (0.79-1.11) | A                       | 0.06215  | 0.06738     | 6.00E-01 | 0.92 (0.66-1.27) | A                     | 0.06271  | 0.0674      | 4.94E-01        | 0.93 (0.74-1.15) |
| rs17199964                    | 102926814 | A                          | 0.07373  | 0.08503     | 5.08E-02        | 0.86 (0.73-1)    | A                       | 0.0791   | 0.08503     | 5.94E-01 | 0.92 (0.69-1.24) | A                     | 0.08014  | 0.085       | 5.20E-01        | 0.94 (0.77-1.14) |
| rs4371620                     | 102927258 | G                          | 0.1936   | 0.2156      | <b>1.08E-02</b> | 0.87 (0.79-0.97) | G                       | 0.2074   | 0.2156      | 6.17E-01 | 0.95 (0.78-1.16) | G                     | 0.2016   | 0.2156      | 2.11E-01        | 0.92 (0.8-1.05)  |
| rs11097755                    | 102928331 | G                          | 0.4407   | 0.454       | 2.10E-01        | 0.95 (0.87-1.03) | G                       | 0.4633   | 0.454       | 6.41E-01 | 1.04 (0.89-1.22) | G                     | 0.4514   | 0.454       | 8.48E-01        | 0.99 (0.89-1.1)  |
| rs4699258                     | 102929711 | A                          | 0.2968   | 0.3326      | <b>3.09E-04</b> | 0.85 (0.77-0.93) | A                       | 0.3258   | 0.3326      | 7.19E-01 | 0.97 (0.82-1.15) | A                     | 0.3071   | 0.3326      | <b>4.81E-02</b> | 0.89 (0.79-1)    |
| rs9998865                     | 102936169 | C                          | 0.1007   | 0.1018      | 8.68E-01        | 0.99 (0.86-1.14) | C                       | 0.0904   | 0.1018      | 3.43E-01 | 0.88 (0.67-1.15) | C                     | 0.0965   | 0.1018      | 5.20E-01        | 0.94 (0.79-1.13) |
| rs7656409                     | 102943428 | A                          | 0.3977   | 0.4338      | <b>5.85E-04</b> | 0.86 (0.79-0.94) | A                       | 0.4167   | 0.4338      | 3.87E-01 | 0.93 (0.8-1.09)  | A                     | 0.4069   | 0.4338      | <b>4.72E-02</b> | 0.9 (0.8-1)      |
| rs6833249                     | 102945096 | A                          | 0.0981   | 0.09936     | 8.42E-01        | 0.99 (0.86-1.13) | A                       | 0.08757  | 0.09936     | 3.22E-01 | 0.87 (0.66-1.15) | A                     | 0.09492  | 0.0994      | 5.87E-01        | 0.95 (0.79-1.14) |
| rs4572885                     | 102954536 | T                          | 0.3694   | 0.396       | <b>1.01E-02</b> | 0.89 (0.82-0.97) | T                       | 0.387    | 0.396       | 6.44E-01 | 0.96 (0.82-1.13) | T                     | 0.3718   | 0.396       | 6.97E-02        | 0.9 (0.81-1.01)  |
| <b>rs17266594<sup>b</sup></b> | 102969945 | C                          | 0.2891   | 0.3309      | <b>2.32E-05</b> | 0.82 (0.75-0.9)  | C                       | 0.3121   | 0.3309      | 3.19E-01 | 0.92 (0.78-1.09) | C                     | 0.298    | 0.3309      | <b>1.03E-02</b> | 0.86 (0.76-0.96) |
| <b>rs10516487<sup>b</sup></b> | 102970099 | T                          | 0.2896   | 0.3309      | <b>2.95E-05</b> | 0.82 (0.75-0.9)  | T                       | 0.3121   | 0.3309      | 3.19E-01 | 0.92 (0.78-1.09) | T                     | 0.298    | 0.3309      | <b>1.03E-02</b> | 0.86 (0.76-0.96) |
| rs10516486                    | 102970299 | A                          | 0.3562   | 0.3929      | <b>3.84E-04</b> | 0.86 (0.78-0.93) | A                       | 0.3701   | 0.3929      | 2.43E-01 | 0.91 (0.77-1.07) | A                     | 0.3663   | 0.3929      | <b>4.63E-02</b> | 0.89 (0.8-1)     |
| rs1469019                     | 102977483 | A                          | 0.06734  | 0.06205     | 3.12E-01        | 1.09 (0.92-1.29) | A                       | 0.05949  | 0.06205     | 7.91E-01 | 0.96 (0.69-1.33) | A                     | 0.06893  | 0.0621      | 3.05E-01        | 1.12 (0.9-1.39)  |
| rs11931658                    | 102985915 | G                          | 0.3287   | 0.3632      | <b>6.63E-04</b> | 0.86 (0.79-0.94) | G                       | 0.3503   | 0.3632      | 5.01E-01 | 0.95 (0.8-1.11)  | G                     | 0.3508   | 0.3632      | 3.48E-01        | 0.95 (0.85-1.06) |
| rs12498977                    | 102988700 | A                          | 0.06448  | 0.06222     | 6.62E-01        | 1.04 (0.88-1.23) | A                       | 0.05508  | 0.06222     | 4.58E-01 | 0.88 (0.62-1.24) | A                     | 0.06208  | 0.0622      | 9.83E-01        | 1 (0.8-1.25)     |
| <b>rs4698977<sup>b</sup></b>  | 103006446 | T                          | 0.3647   | 0.4065      | <b>5.62E-05</b> | 0.84 (0.77-0.91) | T                       | 0.3955   | 0.4065      | 5.75E-01 | 0.96 (0.81-1.12) | T                     | 0.3843   | 0.4065      | 9.92E-02        | 0.91 (0.82-1.02) |
| rs12331849                    | 103009841 | A                          | 0.4232   | 0.4638      | <b>1.29E-04</b> | 0.85 (0.78-0.92) | A                       | 0.4449   | 0.4638      | 3.45E-01 | 0.93 (0.79-1.09) | A                     | 0.4451   | 0.4638      | 1.72E-01        | 0.93 (0.83-1.03) |
| rs3733197                     | 103058310 | A                          | 0.3428   | 0.3711      | <b>5.69E-03</b> | 0.88 (0.81-0.96) | A                       | 0.3743   | 0.3711      | 8.68E-01 | 1.01 (0.86-1.19) | A                     | 0.3603   | 0.3711      | 4.15E-01        | 0.95 (0.85-1.07) |
| rs10014485                    | 103058902 | G                          | 0.1003   | 0.09864     | 7.99E-01        | 1.02 (0.89-1.17) | G                       | 0.1186   | 0.09864     | 9.71E-02 | 1.23 (0.96-1.57) | G                     | 0.1      | 0.0986      | 8.68E-01        | 1.02 (0.85-1.22) |
| rs12331595                    | 103068242 | A                          | 0.4532   | 0.4874      | <b>1.31E-03</b> | 0.87 (0.8-0.95)  | A                       | 0.4746   | 0.4874      | 5.23E-01 | 0.95 (0.81-1.11) | A                     | 0.4723   | 0.4874      | 2.74E-01        | 0.94 (0.85-1.05) |
| rs17208914                    | 103073413 | G                          | 0.4685   | 0.4436      | <b>1.87E-02</b> | 1.11 (1.02-1.2)  | G                       | 0.459    | 0.4436      | 4.37E-01 | 1.06 (0.91-1.25) | G                     | 0.4543   | 0.4436      | 4.33E-01        | 1.04 (0.94-1.16) |
| rs13125328                    | 103074133 | C                          | 0.1032   | 0.1111      | 2.31E-01        | 0.92 (0.8-1.05)  | C                       | 0.1201   | 0.1111      | 4.78E-01 | 1.09 (0.86-1.39) | C                     | 0.1033   | 0.1111      | 3.61E-01        | 0.92 (0.77-1.1)  |
| rs2850374                     | 103112346 | C                          | 0.1104   | 0.116       | 4.05E-01        | 0.95 (0.83-1.08) | C                       | 0.1031   | 0.116       | 3.10E-01 | 0.88 (0.68-1.13) | C                     | 0.1133   | 0.116       | 7.51E-01        | 0.97 (0.82-1.15) |
| rs2850377                     | 103131182 | A                          | 0.4174   | 0.438       | 5.11E-02        | 0.92 (0.85-1)    | A                       | 0.435    | 0.438       | 8.82E-01 | 0.99 (0.84-1.16) | A                     | 0.4299   | 0.438       | 5.52E-01        | 0.97 (0.87-1.08) |
| rs2851318                     | 103134691 | T                          | 0.1118   | 0.1177      | 3.85E-01        | 0.94 (0.83-1.08) | T                       | 0.1017   | 0.1177      | 2.12E-01 | 0.85 (0.66-1.1)  | T                     | 0.114    | 0.1177      | 6.75E-01        | 0.96 (0.81-1.14) |
| rs2631268                     | 103167753 | A                          | 0.2824   | 0.2655      | 7.38E-02        | 1.09 (0.99-1.2)  | A                       | 0.2422   | 0.2655      | 1.87E-01 | 0.88 (0.74-1.06) | A                     | 0.2593   | 0.2655      | 6.11E-01        | 0.97 (0.86-1.1)  |
| rs7685012                     | 103168014 | G                          | 0.1126   | 0.1107      | 7.69E-01        | 1.02 (0.89-1.16) | G                       | 0.09463  | 0.1107      | 1.98E-01 | 0.84 (0.64-1.1)  | G                     | 0.1051   | 0.1107      | 5.14E-01        | 0.94 (0.79-1.12) |
| rs10516491                    | 103171889 | G                          | 0.02035  | 0.02093     | 8.49E-01        | 0.97 (0.72-1.3)  | G                       | 0.01836  | 0.02093     | 6.52E-01 | 0.88 (0.49-1.56) | G                     | 0.01862  | 0.0209      | 5.52E-01        | 0.89 (0.6-1.31)  |
| rs2658529                     | 103183468 | G                          | 0.115    | 0.1007      | <b>2.97E-02</b> | 1.16 (1.02-1.33) | G                       | 0.09746  | 0.1007      | 7.89E-01 | 0.96 (0.74-1.26) | G                     | 0.1084   | 0.1007      | 3.57E-01        | 1.09 (0.91-1.29) |
| rs3113676                     | 103184066 | A                          | 0.01163  | 0.01471     | 2.09E-01        | 0.79 (0.54-1.14) | A                       | 0.01412  | 0.01471     | 9.04E-01 | 0.96 (0.49-1.86) | A                     | 0.01411  | 0.0147      | 8.56E-01        | 0.96 (0.61-1.51) |
| rs3113677                     | 103189210 | A                          | 0.05147  | 0.06127     | <b>4.80E-02</b> | 0.83 (0.69-1)    | A                       | 0.05949  | 0.06127     | 8.53E-01 | 0.97 (0.7-1.35)  | A                     | 0.04983  | 0.0613      | 7.72E-02        | 0.8 (0.63-1.03)  |
| rs12649238                    | 103193010 | C                          | 0.193    | 0.18        | 1.16E-01        | 1.09 (0.98-1.21) | C                       | 0.1742   | 0.18        | 7.06E-01 | 0.96 (0.78-1.18) | C                     | 0.1814   | 0.18        | 8.99E-01        | 1.01 (0.88-1.16) |
| rs10516489                    | 103193382 | A                          | 0.3997   | 0.3993      | 9.68E-01        | 1 (0.92-1.09)    | A                       | 0.4054   | 0.3993      | 7.58E-01 | 1.03 (0.87-1.2)  | A                     | 0.3916   | 0.3993      | 5.68E-01        | 0.97 (0.87-1.08) |
| rs7692330                     | 103216356 | A                          | 0.0624   | 0.06957     | 1.77E-01        | 0.89 (0.75-1.05) | A                       | 0.05932  | 0.06957     | 3.10E-01 | 0.84 (0.61-1.17) | A                     | 0.06377  | 0.0696      | 4.01E-01        | 0.91 (0.73-1.13) |
| rs6816285                     | 103218632 | A                          | 0.412    | 0.4306      | 7.70E-02        | 0.93 (0.85-1.01) | A                       | 0.4195   | 0.4306      | 5.75E-01 | 0.96 (0.82-1.12) | A                     | 0.4312   | 0.4306      | 9.67E-01        | 1 (0.9-1.12)     |
| rs1813006                     | 103220672 | A                          | 0.05946  | 0.06618     | 1.95E-01        | 0.89 (0.75-1.06) | A                       | 0.06215  | 0.06618     | 6.84E-01 | 0.94 (0.68-1.29) | A                     | 0.06208  | 0.0662      | 5.45E-01        | 0.93 (0.75-1.17) |
| rs173218                      | 103242072 | A                          | 0.1929   | 0.1786      | 8.20E-02        | 1.1 (0.99-1.22)  | A                       | 0.1723   | 0.1786      | 6.83E-01 | 0.96 (0.78-1.18) | A                     | 0.1817   | 0.1786      | 7.64E-01        | 1.02 (0.89-1.18) |
| rs236768                      | 103295006 | G                          | 0.1918   | 0.1799      | 1.51E-01        | 1.08 (0.97-1.2)  | G                       | 0.178    | 0.1799      | 8.98E-01 | 0.99 (0.8-1.21)  | G                     | 0.1774   | 0.1799      | 8.10E-01        | 0.98 (0.85-1.13) |

Abbreviation: SNP, Single Nuclear Polymorphism; BP, Base Position; MAF Case, Minor Allele Frequency in cases; MAF Control, Minor Allele Frequency in Controls; P, p-value; OR, Odds Ratio; C.I., Confidence Interval

<sup>b</sup>SNPs rs17266594, rs10516487, and rs4698977 are partially imputed as described in the Materials and Methods section.

\* (# cases/# controls)

**Supplemental Table3c.** Detailed results from subsetting association analysis using 10 ACR clinical criteria to stratify SLE cases.

| SNP                     | BP        | No subsetting (1892/2652)* |          |             |                 |                  | Hematological Disorders (591/2652) |          |             |                 |                  | Immunological Disorders (843/2652) |          |             |                 |                  |
|-------------------------|-----------|----------------------------|----------|-------------|-----------------|------------------|------------------------------------|----------|-------------|-----------------|------------------|------------------------------------|----------|-------------|-----------------|------------------|
|                         |           | Minor Allele               | MAF Case | MAF Control | P               | OR (95% C.I.)    | Minor Allele                       | MAF Case | MAF Control | P               | OR (95% C.I.)    | Minor Allele                       | MAF Case | MAF Control | P               | OR (95% C.I.)    |
| rs4632664               | 102911688 | A                          | 0.06323  | 0.06738     | 4.31E-01        | 0.93 (0.79-1.11) | A                                  | 0.0643   | 0.06738     | 7.01E-01        | 0.95 (0.74-1.23) | A                                  | 0.06295  | 0.0674      | 5.24E-01        | 0.93 (0.74-1.16) |
| rs17199964              | 102926814 | A                          | 0.07373  | 0.08503     | 5.08E-02        | 0.86 (0.73-1)    | A                                  | 0.07191  | 0.08503     | 1.39E-01        | 0.83 (0.66-1.06) | A                                  | 0.07295  | 0.085       | 1.16E-01        | 0.85 (0.69-1.04) |
| rs4371620               | 102927258 | G                          | 0.1936   | 0.2156      | <b>1.08E-02</b> | 0.87 (0.79-0.97) | G                                  | 0.1969   | 0.2156      | 1.56E-01        | 0.89 (0.76-1.05) | G                                  | 0.1933   | 0.2156      | 5.07E-02        | 0.87 (0.76-1)    |
| rs11097755              | 102928331 | G                          | 0.4407   | 0.454       | 2.10E-01        | 0.95 (0.87-1.03) | G                                  | 0.4459   | 0.454       | 6.12E-01        | 0.97 (0.85-1.1)  | G                                  | 0.4494   | 0.454       | 7.43E-01        | 0.98 (0.88-1.1)  |
| rs4699258               | 102929711 | A                          | 0.2968   | 0.3326      | <b>3.09E-04</b> | 0.85 (0.77-0.93) | A                                  | 0.3051   | 0.3326      | 6.88E-02        | 0.88 (0.77-1.01) | A                                  | 0.2797   | 0.3326      | <b>5.04E-05</b> | 0.78 (0.69-0.88) |
| rs9998865               | 102936169 | C                          | 0.1007   | 0.1018      | 8.68E-01        | 0.99 (0.86-1.14) | C                                  | 0.09306  | 0.1018      | 3.65E-01        | 0.91 (0.73-1.12) | C                                  | 0.1097   | 0.1018      | 3.53E-01        | 1.09 (0.91-1.3)  |
| rs7656409               | 102943428 | A                          | 0.3977   | 0.4338      | <b>5.85E-04</b> | 0.86 (0.79-0.94) | A                                  | 0.4019   | 0.4338      | <b>4.46E-02</b> | 0.88 (0.77-1)    | A                                  | 0.3921   | 0.4338      | <b>2.50E-03</b> | 0.84 (0.75-0.94) |
| rs6833249               | 102945096 | A                          | 0.0981   | 0.09936     | 8.42E-01        | 0.99 (0.86-1.13) | A                                  | 0.09306  | 0.09936     | 5.11E-01        | 0.93 (0.75-1.15) | A                                  | 0.1085   | 0.0994      | 2.77E-01        | 1.1 (0.92-1.32)  |
| rs4572885               | 102954536 | T                          | 0.3694   | 0.396       | <b>1.01E-02</b> | 0.89 (0.82-0.97) | T                                  | 0.3839   | 0.396       | 4.40E-01        | 0.95 (0.83-1.08) | T                                  | 0.3545   | 0.396       | <b>2.30E-03</b> | 0.84 (0.75-0.94) |
| rs17266594 <sup>b</sup> | 102969945 | C                          | 0.2891   | 0.3309      | <b>2.32E-05</b> | 0.82 (0.75-0.9)  | C                                  | 0.3063   | 0.3309      | 1.03E-01        | 0.89 (0.78-1.02) | C                                  | 0.2722   | 0.3309      | <b>6.53E-06</b> | 0.76 (0.67-0.85) |
| rs10516487 <sup>b</sup> | 102970099 | T                          | 0.2896   | 0.3309      | <b>2.95E-05</b> | 0.82 (0.75-0.9)  | T                                  | 0.3063   | 0.3309      | 1.03E-01        | 0.89 (0.78-1.02) | T                                  | 0.2722   | 0.3309      | <b>6.53E-06</b> | 0.76 (0.67-0.85) |
| rs10516486              | 102970299 | A                          | 0.3562   | 0.3929      | <b>3.84E-04</b> | 0.86 (0.78-0.93) | A                                  | 0.3714   | 0.3929      | 1.71E-01        | 0.91 (0.8-1.04)  | A                                  | 0.3422   | 0.3929      | <b>1.91E-04</b> | 0.8 (0.72-0.9)   |
| rs1469019               | 102977483 | A                          | 0.06734  | 0.06205     | 3.12E-01        | 1.09 (0.92-1.29) | A                                  | 0.06633  | 0.06205     | 5.85E-01        | 1.07 (0.83-1.39) | A                                  | 0.07083  | 0.0621      | 2.01E-01        | 1.15 (0.93-1.43) |
| rs11931658              | 102985915 | G                          | 0.3287   | 0.3632      | <b>6.63E-04</b> | 0.86 (0.79-0.94) | G                                  | 0.348    | 0.3632      | 3.27E-01        | 0.94 (0.82-1.07) | G                                  | 0.3256   | 0.3632      | <b>4.97E-03</b> | 0.85 (0.75-0.95) |
| rs12498977              | 102988700 | A                          | 0.06448  | 0.06222     | 6.62E-01        | 1.04 (0.88-1.23) | A                                  | 0.06176  | 0.06222     | 9.53E-01        | 0.99 (0.76-1.29) | A                                  | 0.06643  | 0.0622      | 5.36E-01        | 1.07 (0.86-1.34) |
| rs4698977 <sup>b</sup>  | 103006446 | T                          | 0.3647   | 0.4065      | <b>5.62E-05</b> | 0.84 (0.77-0.91) | T                                  | 0.379    | 0.4065      | 8.15E-02        | 0.89 (0.78-1.02) | T                                  | 0.3553   | 0.4065      | <b>1.78E-04</b> | 0.8 (0.72-0.9)   |
| rs12331849              | 103009841 | A                          | 0.4232   | 0.4638      | <b>1.29E-04</b> | 0.85 (0.78-0.92) | A                                  | 0.4389   | 0.4638      | 1.21E-01        | 0.9 (0.8-1.03)   | A                                  | 0.419    | 0.4638      | <b>1.33E-03</b> | 0.83 (0.75-0.93) |
| rs3733197               | 103058310 | A                          | 0.3428   | 0.3711      | <b>5.69E-03</b> | 0.88 (0.81-0.96) | A                                  | 0.3492   | 0.3711      | 1.60E-01        | 0.91 (0.8-1.04)  | A                                  | 0.3319   | 0.3711      | <b>3.68E-03</b> | 0.84 (0.75-0.95) |
| rs10014485              | 103058902 | G                          | 0.1003   | 0.09864     | 7.99E-01        | 1.02 (0.89-1.17) | G                                  | 0.08714  | 0.09864     | 2.26E-01        | 0.87 (0.7-1.09)  | G                                  | 0.1015   | 0.0986      | 7.29E-01        | 1.03 (0.86-1.24) |
| rs12331595              | 103068242 | A                          | 0.4532   | 0.4874      | <b>1.31E-03</b> | 0.87 (0.8-0.95)  | A                                  | 0.467    | 0.4874      | 2.05E-01        | 0.92 (0.81-1.05) | A                                  | 0.4466   | 0.4874      | <b>3.53E-03</b> | 0.85 (0.76-0.95) |
| rs17208914              | 103073413 | G                          | 0.4685   | 0.4436      | <b>1.87E-02</b> | 1.11 (1.02-1.2)  | G                                  | 0.4542   | 0.4436      | 5.06E-01        | 1.04 (0.92-1.19) | G                                  | 0.4709   | 0.4436      | <b>4.97E-02</b> | 1.12 (1-1.25)    |
| rs13125328              | 103074133 | C                          | 0.1032   | 0.1111      | 2.31E-01        | 0.92 (0.8-1.05)  | C                                  | 0.1      | 0.1111      | 2.69E-01        | 0.89 (0.72-1.1)  | C                                  | 0.08859  | 0.1111      | <b>8.90E-03</b> | 0.78 (0.64-0.94) |
| rs2850374               | 103112346 | C                          | 0.1104   | 0.116       | 4.05E-01        | 0.95 (0.83-1.08) | C                                  | 0.119    | 0.116       | 7.71E-01        | 1.03 (0.85-1.25) | C                                  | 0.1168   | 0.116       | 9.32E-01        | 1.01 (0.85-1.2)  |
| rs2850377               | 103131182 | A                          | 0.4174   | 0.438       | 5.11E-02        | 0.92 (0.85-1)    | A                                  | 0.4228   | 0.438       | 3.41E-01        | 0.94 (0.83-1.07) | A                                  | 0.409    | 0.438       | <b>3.68E-02</b> | 0.89 (0.79-0.99) |
| rs2851318               | 103134691 | T                          | 0.1118   | 0.1177      | 3.85E-01        | 0.94 (0.83-1.08) | T                                  | 0.1201   | 0.1177      | 8.14E-01        | 1.02 (0.84-1.24) | T                                  | 0.1192   | 0.1177      | 8.66E-01        | 1.02 (0.86-1.2)  |
| rs2631268               | 103167753 | A                          | 0.2824   | 0.2655      | 7.38E-02        | 1.09 (0.99-1.2)  | A                                  | 0.291    | 0.2655      | 7.35E-02        | 1.14 (0.99-1.31) | A                                  | 0.2923   | 0.2655      | <b>3.15E-02</b> | 1.14 (1.01-1.29) |
| rs7685012               | 103168014 | G                          | 0.1126   | 0.1107      | 7.69E-01        | 1.02 (0.89-1.16) | G                                  | 0.111    | 0.1107      | 9.73E-01        | 1 (0.82-1.23)    | G                                  | 0.1134   | 0.1107      | 7.55E-01        | 1.03 (0.86-1.22) |
| rs10516491              | 103171889 | G                          | 0.02035  | 0.02093     | 8.49E-01        | 0.97 (0.72-1.3)  | G                                  | 0.02115  | 0.02093     | 9.61E-01        | 1.01 (0.65-1.57) | G                                  | 0.02195  | 0.0209      | 8.00E-01        | 1.05 (0.72-1.53) |
| rs2658529               | 103183468 | G                          | 0.115    | 0.1007      | <b>2.97E-02</b> | 1.16 (1.02-1.33) | G                                  | 0.11     | 0.1007      | 3.40E-01        | 1.1 (0.9-1.35)   | G                                  | 0.1168   | 0.1007      | 5.88E-02        | 1.18 (0.99-1.41) |
| rs3113676               | 103184066 | A                          | 0.01163  | 0.01471     | 2.09E-01        | 0.79 (0.54-1.14) | A                                  | 0.01438  | 0.01471     | 9.33E-01        | 0.98 (0.58-1.66) | A                                  | 0.01305  | 0.0147      | 6.18E-01        | 0.89 (0.55-1.43) |
| rs3113677               | 103189210 | A                          | 0.05147  | 0.06127     | <b>4.80E-02</b> | 0.83 (0.69-1)    | A                                  | 0.04538  | 0.06127     | <b>3.60E-02</b> | 0.73 (0.54-0.98) | A                                  | 0.05156  | 0.0613      | 1.42E-01        | 0.83 (0.65-1.06) |
| rs12649238              | 103193010 | C                          | 0.193    | 0.18        | 1.16E-01        | 1.09 (0.98-1.21) | C                                  | 0.1997   | 0.18        | 1.15E-01        | 1.14 (0.97-1.33) | C                                  | 0.2017   | 0.18        | <b>4.63E-02</b> | 1.15 (1-1.32)    |
| rs10516489              | 103193382 | A                          | 0.3997   | 0.3993      | 9.68E-01        | 1 (0.92-1.09)    | A                                  | 0.3985   | 0.3993      | 9.57E-01        | 1 (0.88-1.13)    | A                                  | 0.4004   | 0.3993      | 9.40E-01        | 1 (0.9-1.12)     |
| rs7692330               | 103216356 | A                          | 0.0624   | 0.06957     | 1.77E-01        | 0.89 (0.75-1.05) | A                                  | 0.05678  | 0.06957     | 1.13E-01        | 0.81 (0.62-1.05) | A                                  | 0.06168  | 0.0696      | 2.62E-01        | 0.88 (0.7-1.1)   |
| rs6816285               | 103218632 | A                          | 0.412    | 0.4306      | 7.70E-02        | 0.93 (0.85-1.01) | A                                  | 0.4078   | 0.4306      | 1.52E-01        | 0.91 (0.8-1.04)  | A                                  | 0.4069   | 0.4306      | 8.62E-02        | 0.91 (0.81-1.01) |
| rs1813006               | 103220672 | A                          | 0.05946  | 0.06618     | 1.95E-01        | 0.89 (0.75-1.06) | A                                  | 0.06091  | 0.06618     | 5.08E-01        | 0.92 (0.7-1.19)  | A                                  | 0.05991  | 0.0662      | 3.62E-01        | 0.9 (0.72-1.13)  |
| rs173218                | 103242072 | A                          | 0.1929   | 0.1786      | 8.20E-02        | 1.1 (0.99-1.22)  | A                                  | 0.2005   | 0.1786      | 7.73E-02        | 1.15 (0.98-1.35) | A                                  | 0.1999   | 0.1786      | <b>4.89E-02</b> | 1.15 (1-1.32)    |
| rs236768                | 103295006 | G                          | 0.1918   | 0.1799      | 1.51E-01        | 1.08 (0.97-1.2)  | G                                  | 0.1971   | 0.1799      | 1.67E-01        | 1.12 (0.95-1.31) | G                                  | 0.1942   | 0.1799      | 1.88E-01        | 1.1 (0.96-1.26)  |

Abbreviation: SNP, Single Nuclear Polymorphism; BP, Base Position; MAF Case, Minor Allele Frequency in cases; MAF Control, Minor Allele Frequency in Controls; P, p-value; OR, Odds Ratio; C.I., Confidence Interval

<sup>b</sup>SNPs rs17266594, rs10516487, and rs4698977 are partially imputed as described in the Materials and Methods section.

\* (# cases/# controls)

**Supplemental Table3d.** Detailed results from subsetting association analysis using 10 ACR clinical criteria to stratify SLE cases.

| SNP                           | BP        | No subsetting (1892/2652)* |          |             |                 |                  | Neurological Disorders (207/2652) |          |             |                 |                  | Renal Involvement (425/2652) |          |             |                 |                  |
|-------------------------------|-----------|----------------------------|----------|-------------|-----------------|------------------|-----------------------------------|----------|-------------|-----------------|------------------|------------------------------|----------|-------------|-----------------|------------------|
|                               |           | Minor Allele               | MAF Case | MAF Control | P               | OR (95% C.I.)    | Minor Allele                      | MAF Case | MAF Control | P               | OR (95% C.I.)    | Minor Allele                 | MAF Case | MAF Control | P               | OR (95% C.I.)    |
| rs4632664                     | 102911688 | A                          | 0.06323  | 0.06738     | 4.31E-01        | 0.93 (0.79-1.11) | A                                 | 0.04831  | 0.06738     | 1.32E-01        | 0.7 (0.44-1.12)  | A                            | 0.06501  | 0.0674      | 7.98E-01        | 0.96 (0.72-1.29) |
| rs17199964                    | 102926814 | A                          | 0.07373  | 0.08503     | 5.08E-02        | 0.86 (0.73-1)    | A                                 | 0.06522  | 0.08503     | 1.61E-01        | 0.75 (0.5-1.12)  | A                            | 0.06824  | 0.085       | 9.89E-02        | 0.79 (0.59-1.05) |
| rs4371620                     | 102927258 | G                          | 0.1936   | 0.2156      | <b>1.08E-02</b> | 0.87 (0.79-0.97) | G                                 | 0.1814   | 0.2156      | 1.04E-01        | 0.81 (0.62-1.05) | G                            | 0.1841   | 0.2156      | <b>3.73E-02</b> | 0.82 (0.68-0.99) |
| rs11097755                    | 102928331 | G                          | 0.4407   | 0.454       | 2.10E-01        | 0.95 (0.87-1.03) | G                                 | 0.4417   | 0.454       | 6.31E-01        | 0.95 (0.78-1.17) | G                            | 0.4399   | 0.454       | 4.43E-01        | 0.94 (0.82-1.09) |
| rs4699258                     | 102929711 | A                          | 0.2968   | 0.3326      | <b>3.09E-04</b> | 0.85 (0.77-0.93) | A                                 | 0.2874   | 0.3326      | 5.98E-02        | 0.81 (0.65-1.01) | A                            | 0.3024   | 0.3326      | 8.15E-02        | 0.87 (0.74-1.02) |
| rs9998865                     | 102936169 | C                          | 0.1007   | 0.1018      | 8.68E-01        | 0.99 (0.86-1.14) | C                                 | 0.1014   | 0.1018      | 9.81E-01        | 1 (0.72-1.39)    | C                            | 0.09765  | 0.1018      | 7.09E-01        | 0.95 (0.75-1.22) |
| rs7656409                     | 102943428 | A                          | 0.3977   | 0.4338      | <b>5.85E-04</b> | 0.86 (0.79-0.94) | A                                 | 0.3913   | 0.4338      | 9.24E-02        | 0.84 (0.68-1.03) | A                            | 0.4024   | 0.4338      | 8.53E-02        | 0.88 (0.76-1.02) |
| rs6833249                     | 102945096 | A                          | 0.0981   | 0.09936     | 8.42E-01        | 0.99 (0.86-1.13) | A                                 | 0.09903  | 0.09936     | 9.83E-01        | 1 (0.71-1.39)    | A                            | 0.09647  | 0.0994      | 7.94E-01        | 0.97 (0.76-1.24) |
| rs4572885                     | 102954536 | T                          | 0.3694   | 0.396       | <b>1.01E-02</b> | 0.89 (0.82-0.97) | T                                 | 0.3599   | 0.396       | 1.47E-01        | 0.86 (0.7-1.06)  | T                            | 0.3797   | 0.396       | 3.66E-01        | 0.93 (0.8-1.08)  |
| <b>rs17266594<sup>b</sup></b> | 102969945 | C                          | 0.2891   | 0.3309      | <b>2.32E-05</b> | 0.82 (0.75-0.9)  | C                                 | 0.2705   | 0.3309      | <b>1.17E-02</b> | 0.75 (0.6-0.94)  | C                            | 0.2835   | 0.3309      | <b>6.18E-03</b> | 0.8 (0.68-0.94)  |
| <b>rs10516487<sup>b</sup></b> | 102970099 | T                          | 0.2896   | 0.3309      | <b>2.95E-05</b> | 0.82 (0.75-0.9)  | T                                 | 0.2705   | 0.3309      | <b>1.17E-02</b> | 0.75 (0.6-0.94)  | T                            | 0.2835   | 0.3309      | <b>6.18E-03</b> | 0.8 (0.68-0.94)  |
| rs10516486                    | 102970299 | A                          | 0.3562   | 0.3929      | <b>3.84E-04</b> | 0.86 (0.78-0.93) | A                                 | 0.3478   | 0.3929      | 7.03E-02        | 0.82 (0.67-1.02) | A                            | 0.3541   | 0.3929      | <b>3.13E-02</b> | 0.85 (0.73-0.99) |
| rs1469019                     | 102977483 | A                          | 0.06734  | 0.06205     | 3.12E-01        | 1.09 (0.92-1.29) | A                                 | 0.07971  | 0.06205     | 1.55E-01        | 1.31 (0.9-1.9)   | A                            | 0.07092  | 0.0621      | 3.25E-01        | 1.15 (0.87-1.54) |
| rs11931658                    | 102985915 | G                          | 0.3287   | 0.3632      | <b>6.63E-04</b> | 0.86 (0.79-0.94) | G                                 | 0.3113   | 0.3632      | <b>3.52E-02</b> | 0.79 (0.64-0.98) | G                            | 0.3543   | 0.3632      | 6.16E-01        | 0.96 (0.83-1.12) |
| rs12498977                    | 102988700 | A                          | 0.06448  | 0.06222     | 6.62E-01        | 1.04 (0.88-1.23) | A                                 | 0.06522  | 0.06222     | 8.08E-01        | 1.05 (0.7-1.58)  | A                            | 0.06471  | 0.0622      | 7.81E-01        | 1.04 (0.78-1.4)  |
| <b>rs4698977<sup>b</sup></b>  | 103006446 | T                          | 0.3647   | 0.4065      | <b>5.62E-05</b> | 0.84 (0.77-0.91) | T                                 | 0.3599   | 0.4065      | 6.28E-02        | 0.82 (0.67-1.01) | T                            | 0.3753   | 0.4065      | 8.51E-02        | 0.88 (0.76-1.02) |
| rs12331849                    | 103009841 | A                          | 0.4232   | 0.4638      | <b>1.29E-04</b> | 0.85 (0.78-0.92) | A                                 | 0.4227   | 0.4638      | 1.06E-01        | 0.85 (0.69-1.04) | A                            | 0.4387   | 0.4638      | 1.73E-01        | 0.9 (0.78-1.05)  |
| rs3733197                     | 103058310 | A                          | 0.3428   | 0.3711      | <b>5.69E-03</b> | 0.88 (0.81-0.96) | A                                 | 0.3204   | 0.3711      | <b>3.98E-02</b> | 0.8 (0.64-0.99)  | A                            | 0.367    | 0.3711      | 8.19E-01        | 0.98 (0.85-1.14) |
| rs10014485                    | 103058902 | G                          | 0.1003   | 0.09864     | 7.99E-01        | 1.02 (0.89-1.17) | G                                 | 0.08696  | 0.09864     | 4.41E-01        | 0.87 (0.61-1.24) | G                            | 0.09647  | 0.0986      | 8.44E-01        | 0.98 (0.76-1.25) |
| rs12331595                    | 103068242 | A                          | 0.4532   | 0.4874      | <b>1.31E-03</b> | 0.87 (0.8-0.95)  | A                                 | 0.4444   | 0.4874      | 9.24E-02        | 0.84 (0.69-1.03) | A                            | 0.4753   | 0.4874      | 5.13E-01        | 0.95 (0.82-1.1)  |
| rs17208914                    | 103073413 | G                          | 0.4685   | 0.4436      | <b>1.87E-02</b> | 1.11 (1.02-1.2)  | G                                 | 0.4563   | 0.4436      | 6.17E-01        | 1.05 (0.86-1.29) | G                            | 0.4564   | 0.4436      | 4.87E-01        | 1.05 (0.91-1.22) |
| rs13125328                    | 103074133 | C                          | 0.1032   | 0.1111      | 2.31E-01        | 0.92 (0.8-1.05)  | C                                 | 0.1111   | 0.1111      | 9.99E-01        | 1 (0.73-1.38)    | C                            | 0.1017   | 0.1111      | 4.15E-01        | 0.91 (0.71-1.15) |
| rs2850374                     | 103112346 | C                          | 0.1104   | 0.116       | 4.05E-01        | 0.95 (0.83-1.08) | C                                 | 0.128    | 0.116       | 4.65E-01        | 1.12 (0.83-1.51) | C                            | 0.1078   | 0.116       | 4.87E-01        | 0.92 (0.73-1.16) |
| rs2850377                     | 103131182 | A                          | 0.4174   | 0.438       | 5.11E-02        | 0.92 (0.85-1)    | A                                 | 0.4126   | 0.438       | 3.18E-01        | 0.9 (0.74-1.11)  | A                            | 0.4328   | 0.438       | 7.77E-01        | 0.98 (0.85-1.13) |
| rs2851318                     | 103134691 | T                          | 0.1118   | 0.1177      | 3.85E-01        | 0.94 (0.83-1.08) | T                                 | 0.1256   | 0.1177      | 6.31E-01        | 1.08 (0.8-1.46)  | T                            | 0.1082   | 0.1177      | 4.25E-01        | 0.91 (0.72-1.15) |
| rs2631268                     | 103167753 | A                          | 0.2824   | 0.2655      | 7.38E-02        | 1.09 (0.99-1.2)  | A                                 | 0.2718   | 0.2655      | 7.78E-01        | 1.03 (0.82-1.29) | A                            | 0.3042   | 0.2655      | <b>1.83E-02</b> | 1.21 (1.03-1.42) |
| rs7685012                     | 103168014 | G                          | 0.1126   | 0.1107      | 7.69E-01        | 1.02 (0.89-1.16) | G                                 | 0.1135   | 0.1107      | 8.59E-01        | 1.03 (0.75-1.41) | G                            | 0.1344   | 0.1107      | <b>4.32E-02</b> | 1.25 (1.01-1.55) |
| rs10516491                    | 103171889 | G                          | 0.02035  | 0.02093     | 8.49E-01        | 0.97 (0.72-1.3)  | G                                 | 0.02415  | 0.02093     | 6.60E-01        | 1.16 (0.6-2.23)  | G                            | 0.02235  | 0.0209      | 7.89E-01        | 1.07 (0.65-1.75) |
| rs2658529                     | 103183468 | G                          | 0.115    | 0.1007      | <b>2.97E-02</b> | 1.16 (1.02-1.33) | G                                 | 0.1087   | 0.1007      | 6.03E-01        | 1.09 (0.79-1.5)  | G                            | 0.1141   | 0.1007      | 2.31E-01        | 1.15 (0.91-1.45) |
| rs3113676                     | 103184066 | A                          | 0.01163  | 0.01471     | 2.09E-01        | 0.79 (0.54-1.14) | A                                 | 0.00966  | 0.01471     | 4.06E-01        | 0.65 (0.24-1.79) | A                            | 0.00471  | 0.0147      | <b>1.83E-02</b> | 0.32 (0.12-0.87) |
| rs3113677                     | 103189210 | A                          | 0.05147  | 0.06127     | <b>4.80E-02</b> | 0.83 (0.69-1)    | A                                 | 0.04926  | 0.06127     | 3.28E-01        | 0.79 (0.5-1.26)  | A                            | 0.03469  | 0.0613      | <b>2.18E-03</b> | 0.55 (0.37-0.81) |
| rs12649238                    | 103193010 | C                          | 0.193    | 0.18        | 1.16E-01        | 1.09 (0.98-1.21) | C                                 | 0.1932   | 0.18        | 5.01E-01        | 1.09 (0.85-1.41) | C                            | 0.2005   | 0.18        | 1.53E-01        | 1.14 (0.95-1.37) |
| rs10516489                    | 103193382 | A                          | 0.3997   | 0.3993      | 9.68E-01        | 1 (0.92-1.09)    | A                                 | 0.3937   | 0.3993      | 8.23E-01        | 0.98 (0.8-1.2)   | A                            | 0.4012   | 0.3993      | 9.18E-01        | 1.01 (0.87-1.17) |
| rs7692330                     | 103216356 | A                          | 0.0624   | 0.06957     | 1.77E-01        | 0.89 (0.75-1.05) | A                                 | 0.06039  | 0.06957     | 4.77E-01        | 0.86 (0.57-1.31) | A                            | 0.05176  | 0.0696      | 5.41E-02        | 0.73 (0.53-1.01) |
| rs6816285                     | 103218632 | A                          | 0.412    | 0.4306      | 7.70E-02        | 0.93 (0.85-1.01) | A                                 | 0.413    | 0.4306      | 4.87E-01        | 0.93 (0.76-1.14) | A                            | 0.4141   | 0.4306      | 3.68E-01        | 0.93 (0.81-1.08) |
| rs1813006                     | 103220672 | A                          | 0.05946  | 0.06618     | 1.95E-01        | 0.89 (0.75-1.06) | A                                 | 0.06522  | 0.06618     | 9.40E-01        | 0.98 (0.66-1.48) | A                            | 0.06706  | 0.0662      | 9.24E-01        | 1.01 (0.76-1.36) |
| rs173218                      | 103242072 | A                          | 0.1929   | 0.1786      | 8.20E-02        | 1.1 (0.99-1.22)  | A                                 | 0.1957   | 0.1786      | 3.83E-01        | 1.12 (0.87-1.44) | A                            | 0.2      | 0.1786      | 1.32E-01        | 1.15 (0.96-1.38) |
| rs236768                      | 103295006 | G                          | 0.1918   | 0.1799      | 1.51E-01        | 1.08 (0.97-1.2)  | G                                 | 0.199    | 0.1799      | 3.33E-01        | 1.13 (0.88-1.46) | G                            | 0.1981   | 0.1799      | 2.03E-01        | 1.13 (0.94-1.35) |

Abbreviation: SNP, Single Nuclear Polymorphism; BP, Base Position; MAF Case, Minor Allele Frequency in cases; MAF Control, Minor Allele Frequency in Controls; P, p-value; OR, Odds Ratio; C.I., Confidence Interval

<sup>b</sup>SNPs rs17266594, rs10516487, and rs4698977 are partially imputed as described in the Materials and Methods section.

\* (# cases/# controls)

**Supplemental Table3e.** Detailed results from subsetting association analysis using 10 ACR clinical criteria to stratify SLE cases.

| SNP                           | BP        | No subsetting (1892/2652)* |          |             |                 |                  | Photosensitivity (880/2652) |          |             |                 |                  | Serositis (589/2652) |          |             |                 |                  |
|-------------------------------|-----------|----------------------------|----------|-------------|-----------------|------------------|-----------------------------|----------|-------------|-----------------|------------------|----------------------|----------|-------------|-----------------|------------------|
|                               |           | Minor Allele               | MAF Case | MAF Control | P               | OR (95% C.I.)    | Minor Allele                | MAF Case | MAF Control | P               | OR (95% C.I.)    | Minor Allele         | MAF Case | MAF Control | P               | OR (95% C.I.)    |
| rs4632664                     | 102911688 | A                          | 0.06323  | 0.06738     | 4.31E-01        | 0.93 (0.79-1.11) | A                           | 0.06257  | 0.06738     | 4.82E-01        | 0.92 (0.74-1.15) | A                    | 0.05857  | 0.0674      | 2.70E-01        | 0.86 (0.66-1.12) |
| rs17199964                    | 102926814 | A                          | 0.07373  | 0.08503     | 5.08E-02        | 0.86 (0.73-1)    | A                           | 0.07955  | 0.08503     | 4.72E-01        | 0.93 (0.76-1.13) | A                    | 0.08149  | 0.085       | 6.93E-01        | 0.95 (0.76-1.2)  |
| rs4371620                     | 102927258 | G                          | 0.1936   | 0.2156      | <b>1.08E-02</b> | 0.87 (0.79-0.97) | G                           | 0.1984   | 0.2156      | 1.26E-01        | 0.9 (0.79-1.03)  | G                    | 0.2027   | 0.2156      | 3.29E-01        | 0.92 (0.79-1.08) |
| rs11097755                    | 102928331 | G                          | 0.4407   | 0.454       | 2.10E-01        | 0.95 (0.87-1.03) | G                           | 0.4483   | 0.454       | 6.78E-01        | 0.98 (0.88-1.09) | G                    | 0.4634   | 0.454       | 5.56E-01        | 1.04 (0.92-1.18) |
| rs4699258                     | 102929711 | A                          | 0.2968   | 0.3326      | <b>3.09E-04</b> | 0.85 (0.77-0.93) | A                           | 0.2978   | 0.3326      | <b>7.01E-03</b> | 0.85 (0.76-0.96) | A                    | 0.2956   | 0.3326      | <b>1.44E-02</b> | 0.84 (0.73-0.97) |
| rs9998865                     | 102936169 | C                          | 0.1007   | 0.1018      | 8.68E-01        | 0.99 (0.86-1.14) | C                           | 0.09443  | 0.1018      | 3.71E-01        | 0.92 (0.77-1.11) | C                    | 0.1114   | 0.1018      | 3.29E-01        | 1.11 (0.9-1.35)  |
| rs7656409                     | 102943428 | A                          | 0.3977   | 0.4338      | <b>5.85E-04</b> | 0.86 (0.79-0.94) | A                           | 0.3972   | 0.4338      | <b>7.01E-03</b> | 0.86 (0.77-0.96) | A                    | 0.4117   | 0.4338      | 1.66E-01        | 0.91 (0.8-1.04)  |
| rs6833249                     | 102945096 | A                          | 0.0981   | 0.09936     | 8.42E-01        | 0.99 (0.86-1.13) | A                           | 0.09272  | 0.09936     | 4.16E-01        | 0.93 (0.77-1.11) | A                    | 0.1105   | 0.0994      | 2.50E-01        | 1.13 (0.92-1.38) |
| rs4572885                     | 102954536 | T                          | 0.3694   | 0.396       | <b>1.01E-02</b> | 0.89 (0.82-0.97) | T                           | 0.3714   | 0.396       | 6.69E-02        | 0.9 (0.81-1.01)  | T                    | 0.3741   | 0.396       | 1.64E-01        | 0.91 (0.8-1.04)  |
| <b>rs17266594<sup>b</sup></b> | 102969945 | C                          | 0.2891   | 0.3309      | <b>2.32E-05</b> | 0.82 (0.75-0.9)  | C                           | 0.2943   | 0.3309      | <b>4.44E-03</b> | 0.84 (0.75-0.95) | C                    | 0.2844   | 0.3309      | <b>2.01E-03</b> | 0.8 (0.7-0.92)   |
| <b>rs10516487<sup>b</sup></b> | 102970099 | T                          | 0.2896   | 0.3309      | <b>2.95E-05</b> | 0.82 (0.75-0.9)  | T                           | 0.2943   | 0.3309      | <b>4.44E-03</b> | 0.84 (0.75-0.95) | T                    | 0.2844   | 0.3309      | <b>2.01E-03</b> | 0.8 (0.7-0.92)   |
| rs10516486                    | 102970299 | A                          | 0.3562   | 0.3929      | <b>3.84E-04</b> | 0.86 (0.78-0.93) | A                           | 0.3557   | 0.3929      | <b>5.44E-03</b> | 0.85 (0.76-0.95) | A                    | 0.3591   | 0.3929      | <b>3.13E-02</b> | 0.87 (0.76-0.99) |
| rs1469019                     | 102977483 | A                          | 0.06734  | 0.06205     | 3.12E-01        | 1.09 (0.92-1.29) | A                           | 0.06136  | 0.06205     | 9.17E-01        | 0.99 (0.79-1.24) | A                    | 0.07653  | 0.0621      | 6.78E-02        | 1.25 (0.98-1.6)  |
| rs11931658                    | 102985915 | G                          | 0.3287   | 0.3632      | <b>6.63E-04</b> | 0.86 (0.79-0.94) | G                           | 0.3517   | 0.3632      | 3.84E-01        | 0.95 (0.85-1.07) | G                    | 0.3518   | 0.3632      | 4.61E-01        | 0.95 (0.83-1.09) |
| rs12498977                    | 102988700 | A                          | 0.06448  | 0.06222     | 6.62E-01        | 1.04 (0.88-1.23) | A                           | 0.05739  | 0.06222     | 4.63E-01        | 0.92 (0.73-1.16) | A                    | 0.06706  | 0.0622      | 5.36E-01        | 1.08 (0.84-1.4)  |
| <b>rs4698977<sup>b</sup></b>  | 103006446 | T                          | 0.3647   | 0.4065      | <b>5.62E-05</b> | 0.84 (0.77-0.91) | T                           | 0.3835   | 0.4065      | 8.85E-02        | 0.91 (0.81-1.02) | T                    | 0.3786   | 0.4065      | 7.74E-02        | 0.89 (0.78-1.01) |
| rs12331849                    | 103009841 | A                          | 0.4232   | 0.4638      | <b>1.29E-04</b> | 0.85 (0.78-0.92) | A                           | 0.4379   | 0.4638      | 5.95E-02        | 0.9 (0.81-1)     | A                    | 0.4406   | 0.4638      | 1.49E-01        | 0.91 (0.8-1.03)  |
| rs3733197                     | 103058310 | A                          | 0.3428   | 0.3711      | <b>5.69E-03</b> | 0.88 (0.81-0.96) | A                           | 0.3583   | 0.3711      | 3.36E-01        | 0.95 (0.85-1.06) | A                    | 0.3558   | 0.3711      | 3.26E-01        | 0.94 (0.82-1.07) |
| rs10014485                    | 103058902 | G                          | 0.1003   | 0.09864     | 7.99E-01        | 1.02 (0.89-1.17) | G                           | 0.09375  | 0.09864     | 5.49E-01        | 0.95 (0.79-1.14) | G                    | 0.1087   | 0.0986      | 3.01E-01        | 1.11 (0.91-1.37) |
| rs12331595                    | 103068242 | A                          | 0.4532   | 0.4874      | <b>1.31E-03</b> | 0.87 (0.8-0.95)  | A                           | 0.4636   | 0.4874      | 8.43E-02        | 0.91 (0.82-1.01) | A                    | 0.466    | 0.4874      | 1.85E-01        | 0.92 (0.81-1.04) |
| rs17208914                    | 103073413 | G                          | 0.4685   | 0.4436      | <b>1.87E-02</b> | 1.11 (1.02-1.2)  | G                           | 0.4591   | 0.4436      | 2.57E-01        | 1.07 (0.96-1.19) | G                    | 0.4736   | 0.4436      | 6.09E-02        | 1.13 (0.99-1.28) |
| rs13125328                    | 103074133 | C                          | 0.1032   | 0.1111      | 2.31E-01        | 0.92 (0.8-1.05)  | C                           | 0.1069   | 0.1111      | 6.30E-01        | 0.96 (0.81-1.14) | C                    | 0.09762  | 0.1111      | 1.79E-01        | 0.87 (0.7-1.07)  |
| rs2850374                     | 103112346 | C                          | 0.1104   | 0.116       | 4.05E-01        | 0.95 (0.83-1.08) | C                           | 0.1078   | 0.116       | 3.44E-01        | 0.92 (0.77-1.09) | C                    | 0.112    | 0.116       | 6.93E-01        | 0.96 (0.79-1.17) |
| rs2850377                     | 103131182 | A                          | 0.4174   | 0.438       | 5.11E-02        | 0.92 (0.85-1)    | A                           | 0.4305   | 0.438       | 5.85E-01        | 0.97 (0.87-1.08) | A                    | 0.4089   | 0.438       | 6.85E-02        | 0.89 (0.78-1.01) |
| rs2851318                     | 103134691 | T                          | 0.1118   | 0.1177      | 3.85E-01        | 0.94 (0.83-1.08) | T                           | 0.1074   | 0.1177      | 2.41E-01        | 0.9 (0.76-1.07)  | T                    | 0.1163   | 0.1177      | 8.93E-01        | 0.99 (0.81-1.2)  |
| rs2631268                     | 103167753 | A                          | 0.2824   | 0.2655      | 7.38E-02        | 1.09 (0.99-1.2)  | A                           | 0.2699   | 0.2655      | 7.14E-01        | 1.02 (0.91-1.16) | A                    | 0.2849   | 0.2655      | 1.75E-01        | 1.1 (0.96-1.27)  |
| rs7685012                     | 103168014 | G                          | 0.1126   | 0.1107      | 7.69E-01        | 1.02 (0.89-1.16) | G                           | 0.1041   | 0.1107      | 4.43E-01        | 0.93 (0.78-1.11) | G                    | 0.1088   | 0.1107      | 8.56E-01        | 0.98 (0.8-1.2)   |
| rs10516491                    | 103171889 | G                          | 0.02035  | 0.02093     | 8.49E-01        | 0.97 (0.72-1.3)  | G                           | 0.01648  | 0.02093     | 2.46E-01        | 0.78 (0.52-1.18) | G                    | 0.01783  | 0.0209      | 4.96E-01        | 0.85 (0.53-1.36) |
| rs2658529                     | 103183468 | G                          | 0.115    | 0.1007      | <b>2.97E-02</b> | 1.16 (1.02-1.33) | G                           | 0.1114   | 0.1007      | 2.02E-01        | 1.12 (0.94-1.33) | G                    | 0.1205   | 0.1007      | <b>4.36E-02</b> | 1.22 (1.01-1.49) |
| rs3113676                     | 103184066 | A                          | 0.01163  | 0.01471     | 2.09E-01        | 0.79 (0.54-1.14) | A                           | 0.01364  | 0.01471     | 7.45E-01        | 0.93 (0.58-1.47) | A                    | 0.01443  | 0.0147      | 9.43E-01        | 0.98 (0.58-1.66) |
| rs3113677                     | 103189210 | A                          | 0.05147  | 0.06127     | <b>4.80E-02</b> | 0.83 (0.69-1)    | A                           | 0.0539   | 0.06127     | 2.59E-01        | 0.87 (0.69-1.11) | A                    | 0.05928  | 0.0613      | 7.97E-01        | 0.97 (0.74-1.26) |
| rs12649238                    | 103193010 | C                          | 0.193    | 0.18        | 1.16E-01        | 1.09 (0.98-1.21) | C                           | 0.1869   | 0.18        | 5.15E-01        | 1.05 (0.91-1.2)  | C                    | 0.1986   | 0.18        | 1.35E-01        | 1.13 (0.96-1.32) |
| rs10516489                    | 103193382 | A                          | 0.3997   | 0.3993      | 9.68E-01        | 1 (0.92-1.09)    | A                           | 0.38     | 0.3993      | 1.50E-01        | 0.92 (0.83-1.03) | A                    | 0.392    | 0.3993      | 6.43E-01        | 0.97 (0.85-1.1)  |
| rs7692330                     | 103216356 | A                          | 0.0624   | 0.06957     | 1.77E-01        | 0.89 (0.75-1.05) | A                           | 0.06477  | 0.06957     | 4.90E-01        | 0.93 (0.75-1.15) | A                    | 0.06803  | 0.0696      | 8.51E-01        | 0.98 (0.76-1.25) |
| rs6816285                     | 103218632 | A                          | 0.412    | 0.4306      | 7.70E-02        | 0.93 (0.85-1.01) | A                           | 0.4358   | 0.4306      | 7.03E-01        | 1.02 (0.92-1.14) | A                    | 0.4134   | 0.4306      | 2.81E-01        | 0.93 (0.82-1.06) |
| rs1813006                     | 103220672 | A                          | 0.05946  | 0.06618     | 1.95E-01        | 0.89 (0.75-1.06) | A                           | 0.06818  | 0.06618     | 7.70E-01        | 1.03 (0.83-1.28) | A                    | 0.06197  | 0.0662      | 5.97E-01        | 0.93 (0.72-1.21) |
| rs173218                      | 103242072 | A                          | 0.1929   | 0.1786      | 8.20E-02        | 1.1 (0.99-1.22)  | A                           | 0.1886   | 0.1786      | 3.42E-01        | 1.07 (0.93-1.23) | A                    | 0.2003   | 0.1786      | 8.00E-02        | 1.15 (0.98-1.35) |
| rs236768                      | 103295006 | G                          | 0.1918   | 0.1799      | 1.51E-01        | 1.08 (0.97-1.2)  | G                           | 0.1849   | 0.1799      | 6.41E-01        | 1.03 (0.9-1.19)  | G                    | 0.1981   | 0.1799      | 1.45E-01        | 1.13 (0.96-1.32) |

Abbreviation: SNP, Single Nuclear Polymorphism; BP, Base Position; MAF Case, Minor Allele Frequency in cases; MAF Control, Minor Allele Frequency in Controls; P, p-value; OR, Odds Ratio; C.I., Confidence Interval

<sup>b</sup>SNPs rs17266594, rs10516487, and rs4698977 are partially imputed as described in the Materials and Methods section.

\* (# cases/# controls)
